# Supplementary material for: The fight against malaria in Edo-North, Edo State, Nigeria: identifying risk factors for effective control
Source: PeerJ. 2024 Nov 27;12:e18301. doi: 10.7717/peerj.18301 (PMC11608027; doi:10.7717/peerj.18301)
Supplement: Supplemental Information 2 [file peerj-12-18301-s002.xlsx]

## Sheet: Sheet4
AGE (YEARS)	AGE (GROUPED)
6	5-12
11	5-12
9	5-12
6	5-12
10	5-12
9	5-12
2	0-4
3	0-4
2	0-4
3	0-4
7	5-12
9	5-12
8	5-12
6	5-12
3	0-4
2	0-4
2	0-4
2	0-4
3	0-4
28	>20
11	5-12
6	5-12
6	5-12
8	5-12
9	5-12
6	5-12
7	5-12
6	5-12
12	5-12
11	5-12
12	5-12
1	0-4
1	0-4
9	5-12
6	5-12
7	5-12
6	5-12
5	5-12
8	5-12
7	5-12
6	5-12
6	5-12
5	5-12
12	5-12
8	5-12
7	5-12
1	0-4
11	5-12
11	5-12
12	5-12
9	5-12
11	5-12
4	0-4
4	0-4
10	5-12
11	5-12
6	5-12
12	5-12
11	5-12
12	5-12
6	5-12
6	5-12
9	5-12
1	0-4
11	5-12
9	5-12
8	5-12
11	5-12
11	5-12
7	5-12
11	5-12
2	0-4
9	5-12
6	5-12
7	5-12
2	0-4
12	5-12
12	5-12
14	13-19
15	13-19
12	5-12
12	5-12
6	5-12
6	5-12
9	5-12
8	5-12
6	5-12
7	5-12
7	5-12
14	13-19
7	5-12
11	5-12
1	0-4
9	5-12
5	5-12
19	13-19
10	5-12
18	13-19
6	5-12
6	5-12
5	5-12
11	5-12
11	5-12
8	5-12
9	5-12
11	5-12
10	5-12
14	13-19
23	>20
2	0-4
7	5-12
6	5-12
6	5-12
8	5-12
5	5-12
8	5-12
6	5-12
12	5-12
8	5-12
9	5-12
16	13-19
17	13-19
5	5-12
10	5-12
6	5-12
10	5-12
8	5-12
6	5-12
8	5-12
16	13-19
6	5-12
7	5-12
7	5-12
9	5-12
6	5-12
6	5-12
5	5-12
6	5-12
11	5-12
12	5-12
11	5-12
9	5-12
5	5-12
11	5-12
28	>20
33	>20
17	13-19
31	>20
14	13-19
23	>20
32	>20
16	13-19
21	>20
23	>20
35	>20
33	>20
34	>20
30	>20
26	>20
31	>20
18	13-19
16	13-19
31	>20
24	>20
30	>20
21	>20
34	>20
33	>20
16	13-19
30	>20
33	>20
24	>20
23	>20
28	>20
26	>20
24	>20
24	>20
22	>20
31	>20
17	13-19
28	>20
31	>20
31	>20
34	>20
31	>20
32	>20
14	13-19
14	13-19
21	>20
35	>20
22	>20
29	>20
13	13-19
22	>20
25	>20
21	>20
27	>20
33	>20
30	>20
32	>20
18	13-19
18	13-19
15	13-19
16	13-19
15	13-19
16	13-19
18	13-19
15	13-19
18	13-19
19	13-19
18	13-19
25	>20
29	>20
27	>20
19	13-19
24	>20
21	>20
24	>20
14	13-19
30	>20
27	>20
23	>20
25	>20
33	>20
33	>20
21	>20
35	>20
7	5-12
34	>20
25	>20
14	13-19
17	13-19
19	13-19
17	13-19
15	13-19
11	5-12
16	13-19
15	13-19
19	13-19
17	13-19
5	5-12
15	13-19
17	13-19
15	13-19
16	13-19
14	13-19
15	13-19
16	13-19
7	5-12
5	5-12
6	5-12
32	>20
28	>20
34	>20
23	>20
32	>20
6	5-12
30	>20
24	>20
21	>20
21	>20
28	>20
32	>20
26	>20
12	5-12
26	>20
26	>20
26	>20
26	>20
23	>20
22	>20
29	>20
30	>20
35	>20
24	>20
9	5-12
25	>20
29	>20
34	>20
7	5-12
30	>20
33	>20
27	>20
11	5-12
27	>20
33	>20
33	>20
20	>20
29	>20
29	>20
30	>20
26	>20
18	13-19
17	13-19
15	13-19
15	13-19
13	13-19
15	13-19
9	5-12
7	5-12
16	13-19
15	13-19
18	13-19
16	13-19
17	13-19
9	5-12
28	>20
7	5-12
34	>20
28	>20
22	>20
7	5-12
14	13-19
17	13-19
13	13-19
19	13-19
15	13-19
14	13-19
13	13-19
16	13-19
7	5-12
15	13-19
14	13-19
16	13-19
5	5-12
30	>20
21	>20
26	>20
24	>20
25	>20
30	>20
34	>20
21	>20
25	>20
27	>20
27	>20
24	>20
31	>20
23	>20
33	>20
13	13-19
15	13-19
16	13-19
16	13-19
17	13-19
8	5-12
15	13-19
18	13-19
17	13-19
14	13-19
14	13-19
15	13-19
17	13-19
15	13-19
14	13-19
18	13-19
19	13-19
11	5-12
21	>20
34	>20
28	>20
34	>20
8	5-12
27	>20
29	>20
22	>20
5	5-12
28	>20
26	>20
35	>20
15	13-19
15	13-19
14	13-19
13	13-19
17	13-19
17	13-19
10	5-12
15	13-19
13	13-19
14	13-19
16	13-19
17	13-19
6	5-12
18	13-19
16	13-19
17	13-19
18	13-19
16	13-19
34	>20
28	>20
20	>20
34	>20
28	>20
27	>20
28	>20
32	>20
32	>20
32	>20
22	>20
26	>20
28	>20
10	5-12
8	5-12
29	>20
34	>20
32	>20
23	>20
15	13-19
35	>20
27	>20
34	>20
29	>20
28	>20
21	>20
27	>20
14	13-19
25	>20
31	>20
23	>20
17	13-19
29	>20
25	>20
31	>20
6	5-12
31	>20
28	>20
22	>20
22	>20
32	>20
6	5-12
8	5-12
7	5-12
21	>20
22	>20
25	>20
22	>20
29	>20
29	>20
6	5-12
29	>20
24	>20
34	>20
11	5-12
22	>20
27	>20
25	>20
30	>20
33	>20
24	>20
26	>20
26	>20
23	>20
25	>20
34	>20
27	>20
24	>20
34	>20
34	>20
21	>20
21	>20
28	>20
29	>20
28	>20
27	>20
21	>20
24	>20
28	>20
27	>20
6	5-12
30	>20
33	>20
5	5-12
34	>20
22	>20
29	>20
33	>20
29	>20
31	>20
35	>20
22	>20
28	>20
26	>20
11	5-12
25	>20
35	>20
24	>20
21	>20
31	>20
27	>20
31	>20
24	>20
24	>20
32	>20
30	>20
25	>20
33	>20
21	>20
22	>20
9	5-12
30	>20
32	>20
34	>20
21	>20
31	>20
33	>20
26	>20
28	>20
27	>20
25	>20
34	>20
26	>20
31	>20
21	>20
28	>20
20	>20
30	>20
25	>20
25	>20
9	5-12
33	>20
10	5-12
22	>20
14	13-19
13	13-19
33	>20
34	>20
34	>20
32	>20
26	>20
33	>20
29	>20
14	13-19
28	>20
34	>20
32	>20
21	>20
29	>20
23	>20
27	>20
34	>20
7	5-12
24	>20
29	>20
33	>20
30	>20
29	>20
33	>20
21	>20
26	>20
31	>20
30	>20
28	>20
31	>20
24	>20
9	5-12
25	>20
25	>20
34	>20
25	>20
22	>20
33	>20
30	>20
21	>20
33	>20
26	>20
11	5-12
6	5-12
21	>20
23	>20
21	>20
24	>20
22	>20
24	>20
21	>20
27	>20
34	>20
26	>20
24	>20
22	>20
23	>20
28	>20
28	>20
22	>20
29	>20
26	>20
31	>20
25	>20
32	>20
23	>20
25	>20
28	>20
21	>20
28	>20
33	>20
22	>20
32	>20
28	>20
27	>20
31	>20
27	>20
29	>20
24	>20
28	>20
25	>20
28	>20

## Sheet: Sheet1
S/N	MALARIA PARASITE	SYMPTOMATIC	GENDER	AGE (YEARS)	LOCATION	LGA	EDUCATION	OCCUPATION	MARITAL STATUS	RELIGION	HOUSE TYPE	HOUSE SIZE	TOILET TYPE	Use of Insecticide spray	Presence of Bushes	Presence of Stream	Use of Window nets	Type of Ceiline	Source of Water	Water Storage Method	Had Malaria Before	Last time sick of malaria	Place of Treatment	Drugs Used
1	NEGATIVE	NO	F	6	URBAN	Akoko-Edo	No Education	Business	Single	Muslim	Cement	1-5	WS	Yes	Yes	Yes	No	PVC	Dam/Tap	Dr/Bu/Jc	Yes	6-12mnts	HC	Herbs
2	NEGATIVE	YES	M	11	URBAN	Akoko-Edo	No Education	Unemployed	Single	Muslim	Cement	6-10	WS	No	Yes	No	Yes	POP	River/Stream	Dr/Bu/Jc	Yes	6-12mnts	HC	AF
3	NEGATIVE	NO	F	9	URBAN	Akoko-Edo	Polytechnic	Farmer	Single	Muslim	Cement	6-10	WS	No	No	No	Yes	ASB	River/Stream	Dr/Bu/Jc	Yes	1 yr above	Trad	Herbs
4	NEGATIVE	NO	F	6	URBAN	Owan-West	Secondary	Pupil/Student	Single	Muslim	Cement	1-5	WS	Yes	Yes	No	Yes	PVC	River/Stream	Dr/Bu/Jc	Yes	6-12mnts	HSP	C/Q
5	NEGATIVE	NO	F	10	URBAN	Etsako-East	Polytechnic	Artisan	Single	Muslim	Cement	6-10	WS	Yes	Yes	No	Yes	None	Rain	Dr/Bu/Jc	Yes	6-12mnts	Pharm/CS	AF
6	NEGATIVE	NO	F	9	URBAN	Owan-West	Polytechnic	Business	Single	Christian	Cement	1-5	WS	Yes	Yes	No	No	None	River/Stream	Dr/Bu/Jc	Yes	6-12mnts	HC	AF
7	POSITIVE	YES	F	2	URBAN	Akoko-Edo	No Education	Business	Single	Muslim	Cement	1-5	BT	Yes	Yes	Yes	Yes	ASB	Rain	Dr/Bu/Jc	Yes	1-5 mnts	HC	AF
8	NEGATIVE	NO	M	3	URBAN	Akoko-Edo	Primary	Farmer	Single	Muslim	Cement	6-10	PL	No	Yes	No	No	ASB	River/Stream	Tanks	No	NA	HC	DK
9	NEGATIVE	NO	F	2	URBAN	Akoko-Edo	Polytechnic	Farmer	Single	Muslim	Cement	6-10	PL	No	Yes	Yes	No	POP	Rain	Dr/Bu/Jc	Yes	6-12mnts	HC	AF
10	NEGATIVE	NO	F	3	URBAN	Owan-West	Secondary	Artisan	Single	Muslim	Cement	6-10	WS	No	Yes	No	No	None	River/Stream	Dr/Bu/Jc	Yes	6-12mnts	HSP	AF
11	NEGATIVE	NO	F	7	URBAN	Etsako-East	COE	Pupil/Student	Single	Muslim	Cement	1-5	WS	No	Yes	No	Yes	Ply/Plas	Rain	Dr/Bu/Jc	Yes	1-5 mnts	Pharm/CS	DK
12	NEGATIVE	NO	M	9	URBAN	Etsako-West	No Education	Business	Single	Christian	Cement	1-5	PL	Yes	Yes	No	Yes	PVC	Rain	Tanks	Yes	6-12mnts	Pharm/CS	AF
13	NEGATIVE	NO	M	8	URBAN	Akoko-Edo	No Education	Unemployed	Single	Muslim	Cement	1-5	PL	Yes	Yes	No	Yes	ASB	Rain	Dr/Bu/Jc	Yes	6-12mnts	HC	AF
14	NEGATIVE	NO	M	6	URBAN	Akoko-Edo	No Education	Unemployed	Single	Muslim	Mud	1-5	WS	Yes	Yes	No	No	POP	River/Stream	Dr/Bu/Jc	No	NA	Trad	Herbs
15	POSITIVE	NO	M	3	URBAN	Akoko-Edo	Secondary	Pupil/Student	Single	Muslim	Mud	6-10	BT	No	Yes	Yes	No	PVC	Rain	Dr/Bu/Jc	Yes	1-5 mnts	HC	AF
16	NEGATIVE	NO	F	2	URBAN	Etsako-West	Polytechnic	Farmer	Single	Muslim	Cement	6-10	WS	Yes	Yes	No	No	None	River/Stream	Dr/Bu/Jc	Yes	1-5 mnts	Pharm/CS	AF
17	NEGATIVE	NO	M	2	URBAN	Etsako-East	Secondary	Unemployed	Single	Muslim	Cement	6-10	WS	No	Yes	Yes	No	None	Rain	Dr/Bu/Jc	Yes	1 yr above	HSP	C/Q
18	NEGATIVE	NO	M	2	URBAN	Etsako-West	COE	Civil Servant	Single	Christian	Cement	1-5	WS	No	No	No	Yes	PVC	River/Stream	Tanks	Yes	6-12mnts	HSP	C/Q
19	POSITIVE	NO	F	3	URBAN	Akoko-Edo	Primary	Farmer	Single	Christian	Cement	6-10	WS	Yes	Yes	Yes	No	Ply/Plas	Dam/Tap	Dr/Bu/Jc	Yes	1 yr above	HC	DK
20	POSITIVE	NO	F	28	URBAN	Etsako-Central	Polytechnic	Unemployed	Widow(er)	Christian	Cement	Above 10	PL	Yes	Yes	Yes	Yes	Ply/Plas	River/Stream	Dr/Bu/Jc	Yes	1-5 mnts	HSP	AF
21	NEGATIVE	NO	M	11	RURAL	Akoko-Edo	Primary	Artisan	Single	Christian	Mud	6-10	PL	No	Yes	No	Yes	ASB	Rain	Dr/Bu/Jc	Yes	6-12mnts	HC	DK
22	NEGATIVE	NO	M	6	RURAL	Owan-West	Polytechnic	Farmer	Single	Muslim	Cement	1-5	WS	Yes	Yes	No	Yes	Ply/Plas	Rain	Dr/Bu/Jc	Yes	6-12mnts	HC	C/Q
23	NEGATIVE	NO	M	6	RURAL	Etsako-East	Secondary	Farmer	Single	Christian	Cement	1-5	WS	Yes	Yes	No	No	Ply/Plas	Dam/Tap	Dr/Bu/Jc	No	NA	Pharm/CS	AF
24	NEGATIVE	NO	M	8	RURAL	Etsako-West	COE	Farmer	Single	Muslim	Cement	1-5	PL	Yes	Yes	No	Yes	PVC	River/Stream	Tanks	Yes	1-5 mnts	Trad	Herbs
25	NEGATIVE	NO	F	9	RURAL	Etsako-Central	No Education	Farmer	Single	Muslim	Cement	1-5	WS	Yes	Yes	Yes	Yes	None	Rain	Dr/Bu/Jc	Yes	6-12mnts	HSP	AF
26	NEGATIVE	YES	M	6	RURAL	Etsako-East	No Education	Artisan	Single	Muslim	Cement	1-5	WS	No	Yes	No	No	POP	Borehole	Dr/Bu/Jc	Yes	1 yr above	HC	AF
27	NEGATIVE	YES	M	7	RURAL	Akoko-Edo	No Education	Farmer	Single	Muslim	Cement	6-10	WS	No	Yes	No	Yes	POP	River/Stream	Dr/Bu/Jc	Yes	6-12mnts	HC	AF
28	NEGATIVE	NO	F	6	RURAL	Akoko-Edo	COE	Artisan	Single	Christian	Cement	6-10	BT	No	Yes	No	Yes	POP	Rain	Dr/Bu/Jc	No	NA	Trad	DK
29	NEGATIVE	NO	F	12	RURAL	Akoko-Edo	Secondary	Business	Single	Muslim	Cement	1-5	WS	Yes	No	No	No	PVC	River/Stream	Tanks	Yes	1 yr above	Trad	AF
30	NEGATIVE	NO	F	11	RURAL	Etsako-West	Polytechnic	Pupil/Student	Single	Muslim	Cement	6-10	WS	Yes	Yes	No	Yes	PVC	Borehole	Tanks	Yes	6-12mnts	HSP	AF
31	NEGATIVE	NO	F	12	RURAL	Etsako-East	Secondary	Artisan	Single	Muslim	Cement	1-5	WS	Yes	Yes	No	Yes	PVC	Borehole	Dr/Bu/Jc	Yes	1-5 mnts	HC	Herbs
32	POSITIVE	NO	M	1	URBAN	Owan-West	Polytechnic	Civil Servant	Single	Muslim	Cement	1-5	BT	No	Yes	Yes	Yes	None	Rain	Tanks	Yes	1-5 mnts	Pharm/CS	AF
33	POSITIVE	NO	F	1	URBAN	Etsako-Central	No Education	Pupil/Student	Single	Muslim	Mud	Above 10	BT	No	Yes	Yes	Yes	POP	Rain	Dr/Bu/Jc	Yes	1-5 mnts	Trad	DK
34	NEGATIVE	NO	F	9	RURAL	Etsako-Central	Polytechnic	Farmer	Single	Christian	Cement	1-5	WS	No	Yes	No	Yes	ASB	River/Stream	Dr/Bu/Jc	Yes	1 yr above	HC	AF
35	NEGATIVE	NO	M	6	RURAL	Owan-West	No Education	Farmer	Single	Muslim	Cement	1-5	PL	No	No	No	No	None	Rain	Dr/Bu/Jc	Yes	6-12mnts	HC	AF
36	NEGATIVE	NO	F	7	RURAL	Etsako-East	Polytechnic	Pupil/Student	Single	Muslim	Cement	1-5	PL	Yes	No	Yes	Yes	None	Borehole	Dr/Bu/Jc	Yes	6-12mnts	HSP	DK
37	NEGATIVE	NO	M	6	RURAL	Akoko-Edo	Secondary	Pupil/Student	Single	Muslim	Cement	1-5	WS	Yes	Yes	No	Yes	PVC	Rain	Tanks	Yes	1 yr above	Pharm/CS	C/Q
38	NEGATIVE	NO	M	5	RURAL	Akoko-Edo	Polytechnic	Farmer	Single	Christian	Cement	6-10	WS	Yes	Yes	No	Yes	Ply/Plas	River/Stream	Dr/Bu/Jc	Yes	6-12mnts	Pharm/CS	Herbs
39	NEGATIVE	NO	F	8	RURAL	Akoko-Edo	COE	Farmer	Single	Christian	Cement	6-10	WS	Yes	Yes	No	No	ASB	Borehole	Dr/Bu/Jc	Yes	1-5 mnts	Pharm/CS	AF
40	NEGATIVE	NO	F	7	RURAL	Akoko-Edo	Primary	Artisan	Single	Christian	Cement	6-10	WS	No	Yes	No	No	ASB	River/Stream	Dr/Bu/Jc	Yes	6-12mnts	Pharm/CS	AF
41	NEGATIVE	YES	F	6	RURAL	Etsako-West	Polytechnic	Civil Servant	Single	Christian	Cement	1-5	PL	No	No	No	No	Ply/Plas	River/Stream	Tanks	Yes	6-12mnts	HSP	AF
42	NEGATIVE	YES	F	6	RURAL	Owan-West	Secondary	Artisan	Single	Christian	Cement	1-5	WS	Yes	No	No	No	PVC	Rain	Dr/Bu/Jc	Yes	1 yr above	Pharm/CS	DK
43	NEGATIVE	NO	F	5	RURAL	Etsako-Central	University	Business	Single	Muslim	Cement	1-5	WS	Yes	Yes	No	Yes	Ply/Plas	Borehole	Dr/Bu/Jc	No	NA	Pharm/CS	DK
44	NEGATIVE	NO	F	12	RURAL	Owan-East	COE	Farmer	Single	Muslim	Cement	6-10	WS	Yes	Yes	No	No	ASB	Borehole	Dr/Bu/Jc	Yes	1-5 mnts	Trad	AF
45	NEGATIVE	NO	F	8	RURAL	Etsako-East	Secondary	Artisan	Single	Muslim	Cement	6-10	WS	No	Yes	No	Yes	ASB	Borehole	Tanks	Yes	6-12mnts	HSP	C/Q
46	NEGATIVE	NO	F	7	RURAL	Etsako-Central	Polytechnic	Farmer	Single	Christian	Cement	1-5	PL	No	No	No	Yes	POP	Rain	Dr/Bu/Jc	Yes	6-12mnts	HC	C/Q
47	POSITIVE	NO	M	1	URBAN	Akoko-Edo	COE	Pupil/Student	Single	Muslim	Mud	6-10	BT	Yes	Yes	Yes	Yes	None	Borehole	Dr/Bu/Jc	Yes	1-5 mnts	HC	C/Q
48	NEGATIVE	NO	F	11	RURAL	Owan-East	Polytechnic	Unemployed	Single	Muslim	Cement	1-5	WS	No	No	No	Yes	PVC	River/Stream	Dr/Bu/Jc	Yes	1 yr above	HC	Herbs
49	NEGATIVE	NO	M	11	RURAL	Etsako-East	Secondary	Pupil/Student	Single	Christian	Cement	1-5	WS	Yes	Yes	No	No	PVC	Borehole	Dr/Bu/Jc	Yes	6-12mnts	HC	AF
50	NEGATIVE	NO	M	12	RURAL	Owan-West	Polytechnic	Farmer	Single	Christian	Cement	1-5	WS	Yes	Yes	No	Yes	PVC	Borehole	Tanks	Yes	6-12mnts	Pharm/CS	AF
51	NEGATIVE	NO	M	9	RURAL	Etsako-Central	COE	Pupil/Student	Single	Christian	Mud	1-5	WS	Yes	Yes	No	Yes	POP	River/Stream	Tanks	Yes	1-5 mnts	Pharm/CS	AF
52	NEGATIVE	NO	M	11	RURAL	Owan-East	Primary	Farmer	Single	Christian	Cement	6-10	BT	Yes	Yes	No	Yes	POP	River/Stream	Dr/Bu/Jc	Yes	1 yr above	HSP	DK
53	POSITIVE	NO	M	4	URBAN	Akoko-Edo	Primary	Artisan	Single	Christian	Cement	Above 10	WS	Yes	Yes	No	No	Ply/Plas	Rain	Dr/Bu/Jc	Yes	1-5 mnts	HSP	AF
54	POSITIVE	NO	M	4	URBAN	Akoko-Edo	Secondary	Business	Single	Christian	Mud	Above 10	WS	Yes	Yes	No	No	None	Rain	Dr/Bu/Jc	No	NA	HC	AF
55	NEGATIVE	NO	F	10	URBAN	Etsako-East	Polytechnic	Pupil/Student	Single	Christian	Cement	6-10	WS	No	Yes	No	No	Ply/Plas	Rain	Dr/Bu/Jc	Yes	6-12mnts	Pharm/CS	DK
56	NEGATIVE	NO	M	11	URBAN	Akoko-Edo	Secondary	Pupil/Student	Single	Christian	Cement	6-10	WS	No	Yes	Yes	Yes	PVC	Borehole	Tanks	Yes	6-12mnts	Pharm/CS	Herbs
57	NEGATIVE	NO	F	6	URBAN	Akoko-Edo	Polytechnic	Unemployed	Single	Christian	Cement	1-5	PL	No	Yes	No	Yes	Ply/Plas	River/Stream	Dr/Bu/Jc	Yes	6-12mnts	Pharm/CS	AF
58	NEGATIVE	YES	F	12	URBAN	Akoko-Edo	COE	Farmer	Single	Muslim	Cement	1-5	PL	Yes	Yes	No	Yes	ASB	River/Stream	Dr/Bu/Jc	Yes	1 yr above	Pharm/CS	Herbs
59	NEGATIVE	NO	M	11	URBAN	Akoko-Edo	Secondary	Artisan	Single	Christian	Cement	6-10	WS	Yes	No	No	No	ASB	Borehole	Dr/Bu/Jc	Yes	6-12mnts	Trad	AF
60	NEGATIVE	NO	M	12	URBAN	Owan-West	University	Business	Single	Muslim	Cement	6-10	PL	Yes	No	No	No	PVC	Dam/Tap	Tanks	Yes	1-5 mnts	HC	AF
61	NEGATIVE	NO	F	6	URBAN	Owan-East	Polytechnic	Civil Servant	Single	Muslim	Cement	1-5	WS	Yes	Yes	No	No	None	Rain	Dr/Bu/Jc	Yes	6-12mnts	HSP	AF
62	NEGATIVE	NO	F	6	URBAN	Akoko-Edo	Secondary	Farmer	Single	Christian	Mud	6-10	WS	No	Yes	No	No	None	Dam/Tap	Dr/Bu/Jc	No	NA	HC	DK
63	NEGATIVE	NO	M	9	URBAN	Owan-West	COE	Farmer	Single	Christian	Mud	6-10	WS	No	Yes	No	Yes	None	Borehole	Tanks	Yes	6-12mnts	HC	DK
64	NEGATIVE	NO	M	1	URBAN	Etsako-East	Polytechnic	Farmer	Single	Christian	Cement	1-5	WS	Yes	No	No	Yes	ASB	River/Stream	Dr/Bu/Jc	Yes	6-12mnts	Pharm/CS	DK
65	NEGATIVE	NO	F	11	URBAN	Owan-West	Secondary	Farmer	Single	Christian	Cement	1-5	WS	Yes	Yes	No	No	PVC	River/Stream	Dr/Bu/Jc	Yes	1-5 mnts	Pharm/CS	DK
66	NEGATIVE	NO	M	9	URBAN	Akoko-Edo	Secondary	Pupil/Student	Single	Christian	Cement	6-10	PL	Yes	No	No	Yes	PVC	Rain	Dr/Bu/Jc	Yes	6-12mnts	Pharm/CS	AF
67	NEGATIVE	NO	F	8	URBAN	Akoko-Edo	Polytechnic	Artisan	Single	Christian	Cement	6-10	PL	No	Yes	No	Yes	PVC	Rain	Dr/Bu/Jc	Yes	1 yr above	Pharm/CS	C/Q
68	NEGATIVE	NO	F	11	URBAN	Owan-East	No Education	Civil Servant	Single	Christian	Cement	6-10	WS	No	Yes	No	No	PVC	Borehole	Tanks	Yes	6-12mnts	Pharm/CS	AF
69	NEGATIVE	NO	F	11	URBAN	Etsako-East	Polytechnic	Farmer	Single	Christian	Mud	1-5	BT	No	Yes	No	Yes	ASB	Rain	Tanks	Yes	6-12mnts	Pharm/CS	AF
70	NEGATIVE	NO	F	7	URBAN	Etsako-Central	COE	Farmer	Single	Christian	Mud	6-10	WS	Yes	No	No	Yes	Ply/Plas	River/Stream	Dr/Bu/Jc	Yes	1-5 mnts	Trad	AF
71	NEGATIVE	YES	M	11	URBAN	Owan-East	Secondary	Artisan	Single	Christian	Cement	1-5	WS	Yes	Yes	No	Yes	Ply/Plas	River/Stream	Dr/Bu/Jc	Yes	6-12mnts	HSP	AF
72	NEGATIVE	NO	F	2	URBAN	Etsako-West	Polytechnic	Artisan	Single	Muslim	Cement	1-5	WS	Yes	Yes	No	No	Ply/Plas	River/Stream	Dr/Bu/Jc	Yes	1 yr above	Trad	Herbs
73	NEGATIVE	NO	F	9	URBAN	Akoko-Edo	No Education	Unemployed	Single	Muslim	Cement	1-5	WS	No	Yes	No	Yes	POP	Borehole	Dr/Bu/Jc	Yes	6-12mnts	HC	DK
74	NEGATIVE	NO	F	6	URBAN	Akoko-Edo	Polytechnic	Farmer	Single	Muslim	Cement	1-5	PL	No	Yes	No	Yes	ASB	Borehole	Dr/Bu/Jc	Yes	6-12mnts	Trad	AF
75	NEGATIVE	NO	M	7	URBAN	Etsako-East	Polytechnic	Unemployed	Single	Christian	Cement	6-10	PL	No	No	Yes	No	PVC	River/Stream	Tanks	Yes	1-5 mnts	Pharm/CS	AF
76	POSITIVE	NO	M	2	URBAN	Akoko-Edo	Polytechnic	Unemployed	Single	Christian	Mud	1-5	PL	Yes	Yes	Yes	Yes	None	River/Stream	Tanks	Yes	1-5 mnts	Pharm/CS	C/Q
77	NEGATIVE	NO	M	12	RURAL	Owan-West	Secondary	Pupil/Student	Single	Christian	Mud	6-10	WS	Yes	No	No	No	None	River/Stream	Dr/Bu/Jc	Yes	1 yr above	Pharm/CS	Herbs
78	NEGATIVE	NO	F	12	RURAL	Etsako-Central	Polytechnic	Business	Single	Muslim	Cement	6-10	WS	Yes	Yes	No	No	None	Rain	Dr/Bu/Jc	Yes	1 yr above	Pharm/CS	AF
79	POSITIVE	NO	F	14	URBAN	Akoko-Edo	No Education	Artisan	Married	Muslim	Mud	Above 10	BT	No	Yes	Yes	Yes	PVC	Rain	Dr/Bu/Jc	Yes	1 yr above	Trad	C/Q
80	POSITIVE	YES	F	15	URBAN	Etsako-Central	Secondary	Pupil/Student	Married	Muslim	Cement	6-10	BT	Yes	No	Yes	Yes	Ply/Plas	Borehole	Dr/Bu/Jc	Yes	1-5 mnts	HSP	DK
81	NEGATIVE	NO	M	12	URBAN	Etsako-West	Primary	Farmer	Single	Christian	Cement	1-5	PL	Yes	Yes	No	No	None	Borehole	Dr/Bu/Jc	Yes	6-12mnts	Pharm/CS	AF
82	NEGATIVE	NO	F	12	URBAN	Etsako-East	University	Farmer	Single	Christian	Mud	1-5	PL	No	Yes	No	Yes	PVC	Borehole	Tanks	Yes	6-12mnts	Pharm/CS	DK
83	NEGATIVE	NO	F	6	URBAN	Akoko-Edo	Secondary	Pupil/Student	Single	Christian	Cement	6-10	WS	No	Yes	No	Yes	ASB	Borehole	Dr/Bu/Jc	Yes	6-12mnts	Pharm/CS	AF
84	NEGATIVE	NO	F	6	URBAN	Akoko-Edo	Secondary	Artisan	Single	Christian	Cement	1-5	WS	No	Yes	No	No	Ply/Plas	Borehole	Dr/Bu/Jc	Yes	1 yr above	Pharm/CS	AF
85	NEGATIVE	NO	M	9	URBAN	Akoko-Edo	No Education	Farmer	Single	Christian	Cement	6-10	BT	Yes	Yes	No	Yes	None	River/Stream	Dr/Bu/Jc	No	NA	HSP	Herbs
86	NEGATIVE	NO	F	8	URBAN	Owan-East	COE	Artisan	Single	Christian	Cement	6-10	BT	Yes	Yes	No	Yes	None	River/Stream	Tanks	No	NA	HC	AF
87	NEGATIVE	NO	F	6	URBAN	Owan-West	Polytechnic	Artisan	Single	Christian	Cement	1-5	WS	Yes	Yes	No	Yes	PVC	River/Stream	Dr/Bu/Jc	Yes	1-5 mnts	Trad	DK
88	NEGATIVE	NO	F	7	URBAN	Etsako-Central	Secondary	Artisan	Single	Christian	Mud	6-10	WS	No	No	No	No	ASB	River/Stream	Dr/Bu/Jc	Yes	6-12mnts	Pharm/CS	DK
89	NEGATIVE	NO	F	7	URBAN	Owan-West	Secondary	Farmer	Single	Christian	Mud	6-10	PL	No	Yes	No	Yes	None	Borehole	Dr/Bu/Jc	Yes	1 yr above	Pharm/CS	DK
90	POSITIVE	NO	M	14	URBAN	Etsako-West	COE	Farmer	Married	Christian	Mud	Above 10	BT	Yes	Yes	Yes	No	ASB	Dam/Tap	Claypots	Yes	1-5 mnts	HC	AF
91	NEGATIVE	NO	M	7	RURAL	Etsako-East	Polytechnic	Farmer	Single	Christian	Cement	1-5	WS	No	Yes	No	Yes	POP	Dam/Tap	Tanks	Yes	6-12mnts	Pharm/CS	DK
92	NEGATIVE	NO	M	11	RURAL	Owan-East	No Education	Farmer	Single	Christian	Cement	6-10	PL	Yes	No	No	Yes	PVC	Rain	Tanks	Yes	6-12mnts	Pharm/CS	AF
93	NEGATIVE	NO	M	1	RURAL	Owan-East	Polytechnic	Unemployed	Single	Christian	Cement	1-5	WS	Yes	Yes	No	No	None	River/Stream	Tanks	Yes	1-5 mnts	Pharm/CS	Herbs
94	NEGATIVE	NO	M	9	RURAL	Etsako-Central	Secondary	Pupil/Student	Single	Christian	Mud	6-10	WS	Yes	No	No	Yes	ASB	Borehole	Dr/Bu/Jc	Yes	1 yr above	Pharm/CS	Herbs
95	NEGATIVE	NO	F	5	RURAL	Etsako-East	COE	Farmer	Single	Christian	Cement	6-10	WS	Yes	Yes	No	Yes	ASB	River/Stream	Dr/Bu/Jc	Yes	1-5 mnts	Pharm/CS	Herbs
96	POSITIVE	NO	M	19	URBAN	Etsako-East	No Education	Pupil/Student	Married	Muslim	Mud	1-5	WS	Yes	Yes	No	No	ASB	Rain	Dr/Bu/Jc	Yes	1-5 mnts	HC	AF
97	NEGATIVE	NO	F	10	RURAL	Etsako-West	No Education	Business	Single	Muslim	Mud	1-5	WS	No	Yes	No	Yes	ASB	Dam/Tap	Dr/Bu/Jc	Yes	1-5 mnts	HC	Herbs
98	POSITIVE	NO	F	18	URBAN	Owan-East	Polytechnic	Business	Married	Christian	Mud	Above 10	PL	Yes	Yes	Yes	No	None	River/Stream	Tanks	Yes	1-5 mnts	HSP	DK
99	NEGATIVE	NO	F	6	RURAL	Etsako-East	Secondary	Farmer	Single	Muslim	Cement	1-5	PL	No	Yes	No	No	PVC	River/Stream	Dr/Bu/Jc	Yes	6-12mnts	HC	DK
100	NEGATIVE	NO	F	6	RURAL	Etsako-Central	Secondary	Artisan	Single	Traditional	Cement	6-10	WS	No	No	Yes	No	ASB	Borehole	Dr/Bu/Jc	Yes	1 yr above	HSP	DK
101	NEGATIVE	NO	M	5	RURAL	Etsako-West	Polytechnic	Artisan	Single	Christian	Cement	1-5	WS	Yes	Yes	No	No	ASB	Borehole	Dr/Bu/Jc	Yes	6-12mnts	HSP	DK
102	NEGATIVE	NO	M	11	RURAL	Etsako-East	No Education	Unemployed	Single	Christian	Cement	6-10	WS	Yes	Yes	No	Yes	None	River/Stream	Tanks	Yes	6-12mnts	HC	AF
103	NEGATIVE	NO	M	11	RURAL	Etsako-West	Polytechnic	Farmer	Single	Christian	Cement	6-10	BT	Yes	Yes	No	No	None	River/Stream	Tanks	Yes	6-12mnts	Pharm/CS	AF
104	NEGATIVE	NO	M	8	RURAL	Akoko-Edo	COE	Farmer	Single	Christian	Cement	1-5	WS	No	Yes	No	Yes	PVC	Borehole	Tanks	Yes	1 yr above	Trad	AF
105	NEGATIVE	NO	F	9	RURAL	Akoko-Edo	Secondary	Pupil/Student	Single	Christian	Cement	1-5	WS	Yes	No	No	Yes	None	River/Stream	Dr/Bu/Jc	Yes	1 yr above	Pharm/CS	C/Q
106	NEGATIVE	NO	M	11	RURAL	Etsako-West	Polytechnic	Farmer	Single	Traditional	Cement	6-10	PL	No	No	No	No	POP	Rain	Dr/Bu/Jc	Yes	1 yr above	Pharm/CS	C/Q
107	NEGATIVE	NO	F	10	RURAL	Etsako-East	Secondary	Artisan	Single	Christian	Cement	1-5	PL	Yes	Yes	No	Yes	ASB	River/Stream	Dr/Bu/Jc	Yes	6-12mnts	Pharm/CS	DK
108	POSITIVE	NO	M	14	URBAN	Akoko-Edo	No Education	Unemployed	Widow(er)	Christian	Cement	6-10	PL	No	No	Yes	No	POP	Dam/Tap	Dr/Bu/Jc	No	NA	HC	C/Q
109	NEGATIVE	NO	M	23	RURAL	Etsako-Central	No Education	Artisan	Single	Christian	Cement	6-10	WS	Yes	Yes	No	Yes	PVC	Borehole	Tanks	Yes	6-12mnts	HSP	AF
110	NEGATIVE	NO	F	2	RURAL	Owan-West	Polytechnic	Farmer	Single	Christian	Cement	6-10	WS	Yes	No	No	No	None	River/Stream	Dr/Bu/Jc	Yes	1-5 mnts	Pharm/CS	AF
111	NEGATIVE	NO	F	7	RURAL	Etsako-East	COE	Farmer	Single	Traditional	Cement	1-5	PL	Yes	No	No	Yes	Ply/Plas	River/Stream	Dr/Bu/Jc	Yes	1-5 mnts	Pharm/CS	AF
112	NEGATIVE	YES	M	6	RURAL	Akoko-Edo	No Education	Farmer	Single	Christian	Cement	6-10	WS	No	Yes	No	Yes	None	River/Stream	Dr/Bu/Jc	Yes	6-12mnts	Pharm/CS	Herbs
113	NEGATIVE	NO	M	6	RURAL	Akoko-Edo	Polytechnic	Farmer	Single	Muslim	Cement	1-5	PL	Yes	Yes	No	No	ASB	Borehole	Tanks	Yes	6-12mnts	Trad	Herbs
114	NEGATIVE	NO	M	8	RURAL	Akoko-Edo	Secondary	Civil Servant	Single	Muslim	Mud	6-10	WS	No	Yes	No	No	PVC	River/Stream	Dr/Bu/Jc	Yes	6-12mnts	HC	DK
115	NEGATIVE	NO	M	5	RURAL	Akoko-Edo	Secondary	Business	Single	Muslim	Cement	1-5	WS	Yes	Yes	No	No	PVC	Rain	Dr/Bu/Jc	Yes	6-12mnts	Trad	AF
116	NEGATIVE	NO	F	8	RURAL	Etsako-West	Polytechnic	Artisan	Single	Muslim	Mud	6-10	PL	Yes	Yes	No	No	PVC	River/Stream	Dr/Bu/Jc	Yes	1 yr above	Trad	AF
117	NEGATIVE	NO	F	6	RURAL	Etsako-East	Secondary	Farmer	Single	Christian	Cement	1-5	PL	Yes	Yes	No	Yes	None	River/Stream	Tanks	Yes	6-12mnts	Pharm/CS	AF
118	NEGATIVE	NO	F	12	RURAL	Etsako-Central	Primary	Pupil/Student	Single	Muslim	Mud	1-5	WS	Yes	Yes	No	Yes	POP	River/Stream	Dr/Bu/Jc	Yes	1-5 mnts	Trad	AF
119	NEGATIVE	NO	F	8	RURAL	Etsako-West	Polytechnic	Farmer	Single	None	Cement	6-10	WS	Yes	Yes	No	No	PVC	Borehole	Dr/Bu/Jc	Yes	1-5 mnts	HSP	DK
120	NEGATIVE	YES	F	9	RURAL	Etsako-East	Secondary	Pupil/Student	Single	None	Cement	1-5	WS	Yes	Yes	No	Yes	None	River/Stream	Dr/Bu/Jc	Yes	1-5 mnts	Pharm/CS	DK
121	POSITIVE	NO	M	16	URBAN	Akoko-Edo	University	Pupil/Student	Married	Christian	Mud	Above 10	PL	Yes	Yes	Yes	No	None	Borehole	Dr/Bu/Jc	Yes	1 yr above	HC	DK
122	POSITIVE	NO	M	17	URBAN	Akoko-Edo	No Education	Farmer	Married	Christian	Mud	1-5	BT	Yes	Yes	Yes	Yes	PVC	Rain	Dr/Bu/Jc	Yes	1-5 mnts	HSP	AF
123	NEGATIVE	NO	M	5	RURAL	Owan-East	Secondary	Farmer	Single	Christian	Cement	6-10	WS	No	Yes	Yes	Yes	Ply/Plas	River/Stream	Tanks	Yes	6-12mnts	Pharm/CS	DK
124	NEGATIVE	NO	M	10	RURAL	Akoko-Edo	Polytechnic	Unemployed	Single	Christian	Cement	6-10	WS	Yes	No	No	No	ASB	Borehole	Tanks	No	NA	Pharm/CS	DK
125	NEGATIVE	NO	M	6	RURAL	Owan-West	Secondary	Farmer	Single	Christian	Cement	1-5	PL	Yes	Yes	No	Yes	PVC	River/Stream	Tanks	Yes	6-12mnts	Pharm/CS	AF
126	NEGATIVE	YES	F	10	RURAL	Etsako-East	COE	Farmer	Single	Christian	Cement	1-5	WS	Yes	Yes	No	Yes	PVC	River/Stream	Dr/Bu/Jc	Yes	1-5 mnts	HC	AF
127	NEGATIVE	NO	M	8	RURAL	Akoko-Edo	No Education	Unemployed	Single	Christian	Cement	6-10	WS	Yes	Yes	No	No	PVC	Borehole	Dr/Bu/Jc	Yes	6-12mnts	Pharm/CS	AF
128	NEGATIVE	NO	M	6	RURAL	Etsako-West	No Education	Farmer	Single	Christian	Cement	1-5	WS	Yes	Yes	No	No	PVC	Rain	Dr/Bu/Jc	Yes	6-12mnts	Trad	Herbs
129	NEGATIVE	NO	M	8	RURAL	Etsako-East	Polytechnic	Pupil/Student	Single	Christian	Mud	6-10	WS	No	No	No	No	None	Rain	Dr/Bu/Jc	Yes	6-12mnts	Trad	DK
130	POSITIVE	YES	F	16	URBAN	Akoko-Edo	Secondary	Pupil/Student	Married	Christian	Mud	Above 10	WS	Yes	Yes	No	Yes	None	River/Stream	Dr/Bu/Jc	Yes	1-5 mnts	HC	AF
131	NEGATIVE	NO	F	6	RURAL	Etsako-West	Secondary	Farmer	Single	Christian	Cement	1-5	BT	No	No	No	No	None	Rain	Tanks	Yes	1 yr above	HSP	DK
132	NEGATIVE	NO	M	7	RURAL	Akoko-Edo	Polytechnic	Farmer	Single	Christian	Cement	1-5	PL	No	Yes	No	No	ASB	Borehole	Dr/Bu/Jc	Yes	1-5 mnts	HSP	DK
133	NEGATIVE	NO	F	7	RURAL	Akoko-Edo	COE	Civil Servant	Single	Muslim	Mud	6-10	WS	Yes	Yes	No	Yes	PVC	River/Stream	Dr/Bu/Jc	Yes	6-12mnts	HSP	Herbs
134	NEGATIVE	NO	M	9	RURAL	Akoko-Edo	Secondary	Pupil/Student	Single	None	Cement	1-5	WS	Yes	Yes	No	Yes	POP	River/Stream	Tanks	Yes	6-12mnts	Trad	Herbs
135	NEGATIVE	NO	F	6	RURAL	Owan-East	Secondary	Business	Single	Muslim	Cement	1-5	WS	Yes	Yes	No	No	ASB	Borehole	Dr/Bu/Jc	Yes	1-5 mnts	Pharm/CS	AF
136	NEGATIVE	NO	M	6	RURAL	Etsako-East	No Education	Artisan	Single	Christian	Cement	1-5	WS	Yes	No	No	Yes	ASB	River/Stream	Dr/Bu/Jc	Yes	1-5 mnts	Pharm/CS	AF
137	NEGATIVE	NO	F	5	RURAL	Etsako-West	Polytechnic	Farmer	Single	Muslim	Cement	1-5	WS	Yes	Yes	No	Yes	PVC	River/Stream	Dr/Bu/Jc	Yes	1-5 mnts	HC	DK
138	NEGATIVE	YES	M	6	RURAL	Akoko-Edo	Secondary	Artisan	Single	Muslim	Mud	6-10	WS	Yes	Yes	No	No	ASB	Borehole	Tanks	Yes	6-12mnts	Pharm/CS	DK
139	NEGATIVE	NO	M	11	RURAL	Akoko-Edo	University	Farmer	Single	Muslim	Cement	1-5	WS	Yes	Yes	No	Yes	None	River/Stream	Dr/Bu/Jc	Yes	6-12mnts	Pharm/CS	C/Q
140	NEGATIVE	NO	F	12	RURAL	Owan-West	COE	Farmer	Single	Christian	Mud	1-5	PL	Yes	No	No	Yes	POP	River/Stream	Dr/Bu/Jc	Yes	6-12mnts	Pharm/CS	AF
141	NEGATIVE	NO	M	11	RURAL	Etsako-East	Secondary	Pupil/Student	Single	Christian	Mud	6-10	WS	Yes	Yes	Yes	No	PVC	Rain	Dr/Bu/Jc	Yes	1-5 mnts	Pharm/CS	AF
142	NEGATIVE	NO	M	9	RURAL	Owan-East	Secondary	Unemployed	Single	Christian	Cement	1-5	WS	No	Yes	No	Yes	Ply/Plas	Borehole	Tanks	Yes	6-12mnts	Trad	AF
143	NEGATIVE	YES	F	5	RURAL	Etsako-West	Polytechnic	Pupil/Student	Single	Christian	Cement	1-5	WS	Yes	Yes	No	Yes	None	Borehole	Tanks	No	NA	Pharm/CS	DK
144	NEGATIVE	NO	F	11	RURAL	Etsako-Central	Secondary	Farmer	Single	Christian	Cement	1-5	PL	Yes	Yes	No	Yes	None	River/Stream	Dr/Bu/Jc	Yes	1 yr above	Pharm/CS	AF
145	NEGATIVE	NO	F	28	RURAL	Etsako-East	COE	Farmer	Single	Christian	Cement	6-10	PL	Yes	No	No	Yes	None	River/Stream	Dr/Bu/Jc	Yes	6-12mnts	HSP	AF
146	NEGATIVE	NO	F	33	RURAL	Etsako-Central	Secondary	Artisan	Married	Muslim	Cement	1-5	WS	Yes	Yes	No	No	PVC	Borehole	Dr/Bu/Jc	Yes	1-5 mnts	Pharm/CS	AF
147	POSITIVE	NO	F	17	URBAN	Akoko-Edo	University	Artisan	Married	Christian	Cement	6-10	BT	No	Yes	Yes	Yes	ASB	River/Stream	Tanks	Yes	1-5 mnts	HC	AF
148	NEGATIVE	NO	M	31	RURAL	Owan-East	Polytechnic	Civil Servant	Married	Traditional	Cement	1-5	WS	Yes	Yes	No	No	PVC	River/Stream	Dr/Bu/Jc	Yes	1-5 mnts	HC	Herbs
149	POSITIVE	NO	F	14	URBAN	Akoko-Edo	Primary	Business	Married	Muslim	Mud	Above 10	BT	Yes	Yes	Yes	No	ASB	Borehole	Dr/Bu/Jc	Yes	1-5 mnts	HSP	AF
150	NEGATIVE	NO	F	23	RURAL	Akoko-Edo	Secondary	Pupil/Student	Widow(er)	Muslim	Cement	6-10	WS	Yes	Yes	No	Yes	PVC	River/Stream	Dr/Bu/Jc	Yes	6-12mnts	HC	DK
151	NEGATIVE	NO	M	32	RURAL	Etsako-Central	Secondary	Farmer	Married	Christian	Cement	1-5	WS	Yes	Yes	No	Yes	POP	River/Stream	Dr/Bu/Jc	Yes	6-12mnts	HC	Herbs
152	POSITIVE	NO	M	16	RURAL	Akoko-Edo	University	Pupil/Student	Married	Muslim	Mud	1-5	PL	Yes	Yes	Yes	No	POP	Dam/Tap	Tanks	No	NA	Trad	AF
153	NEGATIVE	NO	M	21	RURAL	Etsako-West	Polytechnic	Unemployed	Single	Muslim	Cement	1-5	PL	Yes	Yes	No	Yes	POP	Borehole	Tanks	Yes	6-12mnts	Pharm/CS	AF
154	NEGATIVE	NO	M	23	RURAL	Etsako-East	Primary	Business	Single	Muslim	Cement	6-10	WS	No	Yes	No	No	ASB	Rain	Dr/Bu/Jc	Yes	6-12mnts	Pharm/CS	AF
155	NEGATIVE	NO	M	35	RURAL	Etsako-West	Polytechnic	Business	Married	Christian	Cement	1-5	BT	Yes	Yes	No	Yes	None	Rain	Dr/Bu/Jc	Yes	1-5 mnts	Pharm/CS	C/Q
156	NEGATIVE	NO	F	33	RURAL	Etsako-Central	Polytechnic	Farmer	Married	Christian	Cement	1-5	WS	Yes	Yes	No	Yes	PVC	Borehole	Tanks	Yes	6-12mnts	Pharm/CS	DK
157	NEGATIVE	NO	M	34	RURAL	Owan-West	Secondary	Artisan	Married	Christian	Cement	6-10	WS	Yes	No	No	No	Ply/Plas	Rain	Dr/Bu/Jc	Yes	6-12mnts	Trad	AF
158	NEGATIVE	NO	F	30	RURAL	Etsako-West	Polytechnic	Artisan	Single	Christian	Mud	1-5	PL	Yes	Yes	No	Yes	Ply/Plas	River/Stream	Dr/Bu/Jc	Yes	1-5 mnts	Pharm/CS	AF
159	NEGATIVE	YES	M	26	RURAL	Etsako-West	Secondary	Artisan	Single	Christian	Cement	1-5	PL	No	Yes	No	Yes	POP	River/Stream	Dr/Bu/Jc	Yes	6-12mnts	HC	AF
160	NEGATIVE	NO	M	31	RURAL	Akoko-Edo	Polytechnic	Farmer	Married	Christian	Cement	1-5	WS	Yes	Yes	No	No	PVC	Borehole	Tanks	Yes	1-5 mnts	Pharm/CS	AF
161	POSITIVE	YES	F	18	RURAL	Akoko-Edo	Secondary	Civil Servant	Married	Christian	Mud	Above 10	PL	No	Yes	Yes	Yes	Ply/Plas	Rain	Dr/Bu/Jc	Yes	1-5 mnts	Pharm/CS	DK
162	POSITIVE	NO	M	16	RURAL	Etsako-Central	No Education	Farmer	Married	Christian	Cement	6-10	WS	Yes	Yes	No	No	None	Borehole	Claypots	Yes	1-5 mnts	HC	C/Q
163	NEGATIVE	NO	M	31	RURAL	Etsako-West	Secondary	Farmer	Widow(er)	Christian	Cement	1-5	WS	Yes	Yes	No	No	ASB	Borehole	Dr/Bu/Jc	Yes	6-12mnts	Pharm/CS	DK
164	NEGATIVE	NO	M	24	RURAL	Owan-East	Polytechnic	Pupil/Student	Single	Christian	Cement	6-10	WS	Yes	No	No	No	Ply/Plas	River/Stream	Dr/Bu/Jc	Yes	1-5 mnts	Pharm/CS	DK
165	NEGATIVE	YES	F	30	RURAL	Etsako-West	Secondary	Pupil/Student	Single	Christian	Cement	1-5	PL	Yes	No	No	Yes	None	Rain	Dr/Bu/Jc	Yes	1 yr above	Pharm/CS	DK
166	NEGATIVE	NO	M	21	RURAL	Etsako-Central	Polytechnic	Farmer	Single	Christian	Cement	1-5	WS	Yes	Yes	No	Yes	PVC	Borehole	Tanks	Yes	1-5 mnts	HSP	AF
167	NEGATIVE	NO	M	34	RURAL	Owan-East	Secondary	Farmer	Widow(er)	Traditional	Cement	6-10	WS	Yes	Yes	No	Yes	Ply/Plas	River/Stream	Dr/Bu/Jc	Yes	6-12mnts	Pharm/CS	AF
168	NEGATIVE	NO	M	33	RURAL	Owan-East	Polytechnic	Artisan	Married	Muslim	Cement	1-5	PL	No	No	No	No	POP	River/Stream	Dr/Bu/Jc	Yes	1-5 mnts	Pharm/CS	AF
169	POSITIVE	NO	F	16	RURAL	Etsako-West	COE	Pupil/Student	Married	Traditional	Mud	Above 10	BT	Yes	No	No	No	PVC	Borehole	Dr/Bu/Jc	Yes	1-5 mnts	HC	DK
170	NEGATIVE	NO	F	30	RURAL	Etsako-West	No Education	Unemployed	Single	Christian	Cement	1-5	PL	Yes	Yes	No	Yes	ASB	River/Stream	Dr/Bu/Jc	Yes	6-12mnts	Trad	DK
171	NEGATIVE	NO	M	33	RURAL	Etsako-Central	Secondary	Civil Servant	Married	Christian	Cement	1-5	WS	Yes	No	No	Yes	None	Borehole	Tanks	No	NA	HC	DK
172	NEGATIVE	NO	M	24	RURAL	Etsako-West	Polytechnic	Farmer	Single	Christian	Cement	1-5	WS	Yes	No	No	Yes	PVC	River/Stream	Dr/Bu/Jc	Yes	1-5 mnts	Trad	DK
173	NEGATIVE	YES	F	23	RURAL	Etsako-West	Secondary	Business	Married	Christian	Cement	6-10	PL	No	No	No	Yes	PVC	River/Stream	Dr/Bu/Jc	Yes	6-12mnts	Trad	AF
174	NEGATIVE	NO	F	28	RURAL	Akoko-Edo	Secondary	Business	Single	Christian	Cement	6-10	BT	Yes	Yes	No	Yes	PVC	Rain	Dr/Bu/Jc	Yes	6-12mnts	Pharm/CS	C/Q
175	NEGATIVE	YES	F	26	RURAL	Owan-West	Polytechnic	Pupil/Student	Single	Christian	Cement	6-10	WS	Yes	No	Yes	Yes	None	Borehole	Tanks	Yes	1-5 mnts	Pharm/CS	C/Q
176	NEGATIVE	NO	M	24	RURAL	Owan-East	No Education	Artisan	Single	Christian	Cement	1-5	PL	Yes	No	No	Yes	None	River/Stream	Tanks	Yes	6-12mnts	Pharm/CS	AF
177	NEGATIVE	NO	M	24	RURAL	Etsako-West	Polytechnic	Pupil/Student	Single	Christian	Cement	1-5	PL	Yes	Yes	No	No	ASB	River/Stream	Tanks	Yes	1-5 mnts	Pharm/CS	DK
178	NEGATIVE	NO	F	22	RURAL	Akoko-Edo	Polytechnic	Farmer	Married	Christian	Cement	1-5	WS	No	Yes	No	Yes	PVC	River/Stream	Dr/Bu/Jc	Yes	1-5 mnts	Pharm/CS	AF
179	NEGATIVE	YES	M	31	RURAL	Etsako-West	Secondary	Farmer	Married	Muslim	Cement	1-5	WS	Yes	Yes	No	Yes	ASB	Borehole	Dr/Bu/Jc	Yes	1-5 mnts	HSP	Herbs
180	POSITIVE	YES	F	17	RURAL	Etsako-West	Primary	Artisan	Married	Christian	Mud	6-10	BT	No	Yes	No	Yes	None	Rain	Dr/Bu/Jc	Yes	1-5 mnts	Trad	AF
181	NEGATIVE	NO	F	28	RURAL	Etsako-East	Secondary	Pupil/Student	Single	Muslim	Mud	6-10	WS	Yes	Yes	No	Yes	ASB	Borehole	Dr/Bu/Jc	Yes	1-5 mnts	Pharm/CS	Herbs
182	NEGATIVE	NO	M	31	RURAL	Owan-West	Polytechnic	Artisan	Married	Christian	Mud	6-10	PL	Yes	No	No	No	None	Dam/Tap	Tanks	Yes	6-12mnts	Trad	AF
183	NEGATIVE	NO	F	31	RURAL	Etsako-Central	Primary	Farmer	Married	Christian	Cement	1-5	WS	Yes	No	No	Yes	PVC	Rain	Dr/Bu/Jc	Yes	1 yr above	Trad	DK
184	NEGATIVE	NO	M	34	RURAL	Owan-East	Secondary	Farmer	Married	Christian	Mud	6-10	WS	Yes	Yes	No	Yes	None	Borehole	Dr/Bu/Jc	Yes	6-12mnts	Pharm/CS	AF
185	NEGATIVE	NO	F	31	RURAL	Etsako-West	Polytechnic	Artisan	Married	Christian	Cement	1-5	PL	No	Yes	No	Yes	POP	River/Stream	Dr/Bu/Jc	Yes	1-5 mnts	HC	AF
186	NEGATIVE	NO	F	32	RURAL	Etsako-West	Secondary	Farmer	Married	Muslim	Cement	1-5	PL	Yes	Yes	No	Yes	POP	River/Stream	Tanks	Yes	1-5 mnts	HC	C/Q
187	POSITIVE	YES	F	14	RURAL	Etsako-Central	Polytechnic	Farmer	Married	Muslim	Mud	1-5	WS	Yes	Yes	No	Yes	None	Borehole	Dr/Bu/Jc	Yes	1-5 mnts	Pharm/CS	AF
188	POSITIVE	NO	M	14	RURAL	Owan-East	No Education	Unemployed	Married	Christian	Cement	Above 10	PL	Yes	Yes	Yes	Yes	PVC	Rain	Tanks	Yes	1-5 mnts	HSP	AF
189	NEGATIVE	NO	M	21	RURAL	Etsako-Central	Polytechnic	Artisan	Single	Christian	Cement	1-5	BT	Yes	No	No	Yes	PVC	Borehole	Dr/Bu/Jc	Yes	1-5 mnts	HC	DK
190	NEGATIVE	NO	F	35	RURAL	Owan-West	Secondary	Business	Married	Christian	Mud	1-5	WS	Yes	Yes	No	Yes	POP	River/Stream	Dr/Bu/Jc	Yes	6-12mnts	HC	AF
191	NEGATIVE	NO	M	22	RURAL	Etsako-Central	Polytechnic	Artisan	Single	Christian	Cement	1-5	WS	No	No	No	Yes	Ply/Plas	River/Stream	Dr/Bu/Jc	Yes	6-12mnts	HC	AF
192	NEGATIVE	NO	M	29	RURAL	Owan-East	No Education	Farmer	Single	Christian	Mud	6-10	BT	No	No	No	Yes	ASB	Borehole	Tanks	Yes	1-5 mnts	Pharm/CS	Herbs
193	POSITIVE	NO	M	13	RURAL	Etsako-Central	University	Pupil/Student	Married	Christian	Mud	6-10	BT	Yes	Yes	Yes	Yes	ASB	River/Stream	Dr/Bu/Jc	No	NA	HC	AF
194	NEGATIVE	NO	M	22	RURAL	Etsako-West	Polytechnic	Unemployed	Single	Christian	Cement	1-5	WS	Yes	Yes	No	No	PVC	River/Stream	Dr/Bu/Jc	Yes	1-5 mnts	Pharm/CS	DK
195	NEGATIVE	NO	M	25	RURAL	Akoko-Edo	Secondary	Pupil/Student	Single	Christian	Mud	6-10	PL	Yes	No	No	Yes	PVC	River/Stream	Dr/Bu/Jc	Yes	1-5 mnts	Pharm/CS	Herbs
196	NEGATIVE	NO	M	21	RURAL	Etsako-West	Polytechnic	Farmer	Single	Christian	Cement	1-5	PL	Yes	No	No	Yes	PVC	Rain	Dr/Bu/Jc	Yes	6-12mnts	HSP	Herbs
197	NEGATIVE	NO	M	27	RURAL	Etsako-Central	No Education	Unemployed	Single	Christian	Cement	1-5	WS	Yes	No	No	Yes	ASB	Borehole	Tanks	Yes	6-12mnts	Pharm/CS	Herbs
198	NEGATIVE	YES	F	33	RURAL	Etsako-East	Polytechnic	Pupil/Student	Married	Muslim	Cement	1-5	WS	No	Yes	No	Yes	None	Dam/Tap	Dr/Bu/Jc	Yes	1-5 mnts	Pharm/CS	AF
199	NEGATIVE	NO	M	30	RURAL	Owan-East	Secondary	Farmer	Widow(er)	Muslim	Cement	1-5	WS	Yes	Yes	No	Yes	PVC	River/Stream	Dr/Bu/Jc	No	NA	Pharm/CS	DK
200	NEGATIVE	NO	M	32	RURAL	Etsako-West	Polytechnic	Pupil/Student	Widow(er)	Traditional	Cement	1-5	WS	Yes	Yes	No	Yes	None	Borehole	Dr/Bu/Jc	Yes	1-5 mnts	Trad	AF
201	NEGATIVE	NO	M	18	RURAL	Etsako-Central	Secondary	Artisan	Single	Christian	Cement	6-10	PL	Yes	No	No	Yes	None	River/Stream	Tanks	Yes	6-12mnts	Trad	AF
202	NEGATIVE	YES	F	18	RURAL	Etsako-West	Secondary	Civil Servant	Single	Traditional	Mud	1-5	BT	Yes	Yes	No	Yes	ASB	River/Stream	Dr/Bu/Jc	Yes	1-5 mnts	Pharm/CS	DK
203	NEGATIVE	NO	F	15	RURAL	Etsako-East	Polytechnic	Farmer	Single	Muslim	Mud	6-10	BT	Yes	No	No	Yes	PVC	Rain	Dr/Bu/Jc	Yes	6-12mnts	HC	AF
204	NEGATIVE	NO	F	16	RURAL	Owan-East	Secondary	Farmer	Single	Christian	Cement	1-5	WS	Yes	No	No	No	ASB	Borehole	Dr/Bu/Jc	Yes	6-12mnts	Pharm/CS	C/Q
205	NEGATIVE	NO	F	15	RURAL	Etsako-West	No Education	Unemployed	Single	Christian	Cement	6-10	WS	Yes	Yes	No	Yes	ASB	Borehole	Dr/Bu/Jc	Yes	1-5 mnts	Pharm/CS	AF
206	NEGATIVE	NO	F	16	RURAL	Etsako-Central	Polytechnic	Pupil/Student	Single	Christian	Cement	6-10	WS	Yes	No	No	Yes	None	River/Stream	Tanks	Yes	6-12mnts	Pharm/CS	AF
207	NEGATIVE	NO	M	18	RURAL	Owan-East	Secondary	Farmer	Single	Christian	Cement	1-5	WS	No	No	No	Yes	PVC	River/Stream	Tanks	Yes	6-12mnts	Pharm/CS	DK
208	NEGATIVE	NO	F	15	RURAL	Owan-West	Polytechnic	Business	Single	Christian	Cement	1-5	WS	No	Yes	No	Yes	None	River/Stream	Tanks	Yes	1-5 mnts	Pharm/CS	AF
209	NEGATIVE	NO	M	18	RURAL	Etsako-Central	Polytechnic	Pupil/Student	Single	Muslim	Cement	6-10	WS	Yes	Yes	No	Yes	ASB	Borehole	Tanks	Yes	1-5 mnts	HSP	Herbs
210	NEGATIVE	NO	M	19	RURAL	Owan-East	Secondary	Pupil/Student	Single	Christian	Cement	1-5	WS	Yes	Yes	No	Yes	PVC	River/Stream	Dr/Bu/Jc	Yes	1-5 mnts	Trad	Herbs
211	POSITIVE	NO	F	18	RURAL	Etsako-West	Secondary	Civil Servant	Married	Christian	Mud	Above 10	PL	No	Yes	No	Yes	ASB	Borehole	Dr/Bu/Jc	Yes	1-5 mnts	HC	DK
212	NEGATIVE	NO	M	25	RURAL	Etsako-West	Secondary	Farmer	Single	Christian	Mud	6-10	PL	Yes	Yes	No	Yes	PVC	Rain	Dr/Bu/Jc	Yes	6-12mnts	Trad	DK
213	NEGATIVE	NO	M	29	RURAL	Etsako-Central	University	Unemployed	Single	Christian	Mud	6-10	WS	Yes	Yes	No	Yes	PVC	Borehole	Dr/Bu/Jc	Yes	1-5 mnts	Trad	Herbs
214	NEGATIVE	NO	F	27	RURAL	Owan-West	Secondary	Artisan	Single	Christian	Cement	1-5	WS	No	No	Yes	No	POP	Rain	Tanks	Yes	1-5 mnts	HC	Herbs
215	POSITIVE	NO	M	19	RURAL	Owan-West	No Education	Artisan	Married	Christian	Mud	1-5	WS	Yes	Yes	No	No	ASB	Dam/Tap	Dr/Bu/Jc	Yes	1-5 mnts	Trad	C/Q
216	NEGATIVE	NO	F	24	RURAL	Etsako-West	Polytechnic	Civil Servant	Single	Christian	Cement	1-5	PL	Yes	No	No	Yes	POP	Rain	Dr/Bu/Jc	Yes	1-5 mnts	Pharm/CS	AF
217	NEGATIVE	NO	F	21	RURAL	Owan-East	Secondary	Farmer	Single	Christian	Cement	6-10	BT	Yes	Yes	No	Yes	POP	Borehole	Dr/Bu/Jc	Yes	1-5 mnts	Pharm/CS	AF
218	NEGATIVE	NO	M	24	RURAL	Etsako-Central	Polytechnic	Pupil/Student	Single	Christian	Cement	1-5	WS	Yes	Yes	No	Yes	PVC	Dam/Tap	Dr/Bu/Jc	Yes	1-5 mnts	Pharm/CS	AF
219	POSITIVE	NO	F	14	RURAL	Etsako-East	Polytechnic	Pupil/Student	Married	Muslim	Cement	Above 10	BT	Yes	Yes	Yes	No	POP	Rain	Dr/Bu/Jc	Yes	1-5 mnts	HC	DK
220	NEGATIVE	NO	M	30	RURAL	Etsako-West	Polytechnic	Farmer	Married	Muslim	Cement	6-10	BT	No	Yes	No	Yes	None	River/Stream	Tanks	Yes	1-5 mnts	Pharm/CS	DK
221	NEGATIVE	NO	M	27	URBAN	Akoko-Edo	Secondary	Farmer	Single	Christian	Cement	1-5	BT	Yes	Yes	No	Yes	None	River/Stream	Dr/Bu/Jc	No	NA	Pharm/CS	AF
222	NEGATIVE	NO	F	23	URBAN	Owan-West	Secondary	Pupil/Student	Single	Muslim	Cement	1-5	WS	Yes	No	No	Yes	Ply/Plas	Borehole	Dr/Bu/Jc	Yes	6-12mnts	Pharm/CS	C/Q
223	NEGATIVE	NO	F	25	URBAN	Etsako-Central	Polytechnic	Farmer	Married	Muslim	Cement	6-10	WS	Yes	Yes	No	Yes	PVC	River/Stream	Dr/Bu/Jc	Yes	1-5 mnts	HSP	AF
224	NEGATIVE	NO	M	33	URBAN	Owan-East	Primary	Artisan	Married	Christian	Cement	6-10	WS	Yes	Yes	No	Yes	ASB	Rain	Tanks	Yes	1-5 mnts	Trad	AF
225	NEGATIVE	NO	M	33	URBAN	Etsako-West	Polytechnic	Artisan	Married	Christian	Cement	6-10	WS	Yes	No	No	No	None	Borehole	Dr/Bu/Jc	Yes	6-12mnts	Pharm/CS	DK
226	NEGATIVE	NO	M	21	RURAL	Etsako-Central	Secondary	Farmer	Single	Christian	Mud	1-5	WS	No	Yes	No	Yes	None	River/Stream	Dr/Bu/Jc	Yes	6-12mnts	Pharm/CS	AF
227	NEGATIVE	NO	F	35	RURAL	Owan-West	Polytechnic	Farmer	Married	Christian	Cement	1-5	PL	Yes	Yes	No	Yes	PVC	River/Stream	Dr/Bu/Jc	Yes	1-5 mnts	Pharm/CS	Herbs
228	POSITIVE	NO	M	7	RURAL	Owan-East	Primary	Business	Single	Christian	Mud	6-10	BT	Yes	Yes	No	No	ASB	Borehole	Dr/Bu/Jc	Yes	1-5 mnts	HSP	AF
229	NEGATIVE	NO	M	34	RURAL	Etsako-West	University	Business	Married	Christian	Cement	1-5	BT	Yes	Yes	No	Yes	PVC	River/Stream	Tanks	Yes	6-12mnts	Pharm/CS	Herbs
230	NEGATIVE	NO	F	25	URBAN	Etsako-West	Secondary	Pupil/Student	Married	Christian	Cement	1-5	WS	Yes	Yes	No	Yes	PVC	Borehole	Dr/Bu/Jc	Yes	1-5 mnts	HC	DK
231	NEGATIVE	NO	F	14	URBAN	Owan-East	Polytechnic	Artisan	Single	Christian	Cement	6-10	PL	Yes	No	No	Yes	Ply/Plas	River/Stream	Dr/Bu/Jc	Yes	1-5 mnts	HC	DK
232	NEGATIVE	YES	M	17	URBAN	Etsako-Central	Polytechnic	Pupil/Student	Single	Christian	Cement	1-5	WS	No	Yes	No	Yes	ASB	River/Stream	Dr/Bu/Jc	Yes	6-12mnts	HC	DK
233	NEGATIVE	NO	F	19	URBAN	Owan-West	Secondary	Civil Servant	Married	Christian	Mud	1-5	WS	No	Yes	No	Yes	PVC	Rain	Tanks	Yes	1-5 mnts	Pharm/CS	Herbs
234	NEGATIVE	NO	M	17	URBAN	Etsako-West	Polytechnic	Farmer	Single	Christian	Cement	6-10	PL	Yes	Yes	No	Yes	ASB	Borehole	Tanks	Yes	1-5 mnts	HSP	AF
235	NEGATIVE	YES	M	15	RURAL	Owan-East	Secondary	Farmer	Single	Christian	Cement	1-5	BT	Yes	Yes	No	Yes	POP	Borehole	Tanks	Yes	6-12mnts	HC	AF
236	POSITIVE	NO	M	11	RURAL	Etsako-West	COE	Unemployed	Single	Muslim	Mud	Above 10	PL	Yes	Yes	No	Yes	ASB	River/Stream	Dr/Bu/Jc	No	NA	HC	DK
237	NEGATIVE	NO	F	16	RURAL	Owan-East	Polytechnic	Farmer	Single	Christian	Mud	1-5	WS	Yes	No	No	Yes	PVC	River/Stream	Dr/Bu/Jc	Yes	1-5 mnts	HC	DK
238	NEGATIVE	NO	F	15	URBAN	Etsako-West	COE	Pupil/Student	Single	Muslim	Cement	6-10	WS	Yes	No	No	Yes	ASB	River/Stream	Dr/Bu/Jc	Yes	1 yr above	Pharm/CS	AF
239	NEGATIVE	NO	F	19	URBAN	Etsako-Central	Polytechnic	Pupil/Student	Married	Muslim	Cement	1-5	WS	Yes	No	No	No	ASB	River/Stream	Dr/Bu/Jc	Yes	6-12mnts	Pharm/CS	AF
240	NEGATIVE	NO	F	17	URBAN	Owan-West	Secondary	Artisan	Married	Christian	Cement	6-10	WS	Yes	Yes	No	Yes	None	Borehole	Tanks	Yes	6-12mnts	Trad	Herbs
241	POSITIVE	NO	F	5	RURAL	Akoko-Edo	Primary	Artisan	Single	Muslim	Cement	1-5	WS	No	Yes	Yes	Yes	Ply/Plas	Dam/Tap	Tanks	Yes	1-5 mnts	HC	DK
242	NEGATIVE	NO	M	15	RURAL	Etsako-West	University	Farmer	Single	Muslim	Cement	1-5	WS	Yes	Yes	No	Yes	PVC	Rain	Tanks	Yes	6-12mnts	Pharm/CS	DK
243	NEGATIVE	NO	M	17	RURAL	Akoko-Edo	Polytechnic	Pupil/Student	Single	Muslim	Cement	1-5	WS	Yes	Yes	No	Yes	None	Rain	Tanks	Yes	1-5 mnts	HC	AF
244	NEGATIVE	NO	M	15	URBAN	Owan-East	Secondary	Farmer	Single	Christian	Mud	1-5	WS	No	Yes	No	Yes	POP	Rain	Dr/Bu/Jc	Yes	6-12mnts	HC	AF
245	NEGATIVE	NO	F	16	URBAN	Akoko-Edo	Secondary	Farmer	Single	Muslim	Cement	1-5	WS	Yes	Yes	No	Yes	ASB	Borehole	Dr/Bu/Jc	Yes	6-12mnts	HC	DK
246	NEGATIVE	NO	F	14	URBAN	Etsako-West	Primary	Unemployed	Single	Muslim	Mud	1-5	WS	Yes	No	No	Yes	PVC	Rain	Dr/Bu/Jc	Yes	1-5 mnts	HC	DK
247	NEGATIVE	NO	M	15	URBAN	Etsako-East	University	Business	Single	Christian	Cement	1-5	BT	Yes	No	No	Yes	Ply/Plas	Dam/Tap	Tanks	Yes	1-5 mnts	HSP	DK
248	NEGATIVE	NO	M	16	URBAN	Owan-West	Secondary	Civil Servant	Single	Christian	Cement	6-10	BT	No	Yes	No	Yes	None	River/Stream	Dr/Bu/Jc	Yes	6-12mnts	HC	DK
249	POSITIVE	YES	M	7	RURAL	Owan-West	Polytechnic	Pupil/Student	Single	Christian	Mud	Above 10	BT	No	Yes	No	Yes	PVC	Rain	Dr/Bu/Jc	Yes	1-5 mnts	Pharm/CS	AF
250	POSITIVE	NO	M	5	RURAL	Etsako-West	Secondary	Farmer	Single	Christian	Cement	6-10	BT	Yes	No	No	Yes	ASB	Rain	Dr/Bu/Jc	Yes	1-5 mnts	HC	AF
251	POSITIVE	NO	M	6	RURAL	Owan-East	No Education	Unemployed	Single	Muslim	Mud	Above 10	WS	Yes	Yes	Yes	No	ASB	River/Stream	Dr/Bu/Jc	Yes	1-5 mnts	HC	AF
252	NEGATIVE	YES	M	32	RURAL	Etsako-West	Polytechnic	Artisan	Married	Christian	Cement	1-5	BT	Yes	Yes	No	Yes	None	Borehole	Dr/Bu/Jc	Yes	6-12mnts	Pharm/CS	AF
253	NEGATIVE	NO	M	28	RURAL	Etsako-Central	Secondary	Farmer	Single	Christian	Cement	1-5	WS	Yes	Yes	No	Yes	PVC	River/Stream	Dr/Bu/Jc	Yes	1-5 mnts	Pharm/CS	AF
254	NEGATIVE	NO	M	34	RURAL	Etsako-East	University	Farmer	Married	Christian	Cement	6-10	WS	Yes	Yes	No	Yes	PVC	Rain	Dr/Bu/Jc	Yes	1-5 mnts	HC	DK
255	NEGATIVE	NO	F	23	RURAL	Owan-East	Polytechnic	Farmer	Married	Christian	Cement	1-5	PL	Yes	No	No	Yes	PVC	Borehole	Dr/Bu/Jc	Yes	1-5 mnts	Pharm/CS	C/Q
256	NEGATIVE	NO	M	32	RURAL	Etsako-West	No Education	Unemployed	Married	Christian	Cement	1-5	WS	No	Yes	No	Yes	ASB	River/Stream	Dr/Bu/Jc	Yes	1-5 mnts	Pharm/CS	AF
257	POSITIVE	NO	M	6	RURAL	Etsako-East	Polytechnic	Farmer	Single	Muslim	Cement	Above 10	WS	No	Yes	No	Yes	ASB	Dam/Tap	Dr/Bu/Jc	Yes	1-5 mnts	HSP	AF
258	NEGATIVE	NO	M	30	RURAL	Etsako-West	Polytechnic	Unemployed	Married	Muslim	Cement	6-10	PL	Yes	Yes	Yes	No	POP	River/Stream	Dr/Bu/Jc	Yes	6-12mnts	Pharm/CS	AF
259	NEGATIVE	NO	M	24	URBAN	Etsako-Central	University	Farmer	Single	Christian	Cement	1-5	WS	Yes	Yes	No	Yes	PVC	River/Stream	Tanks	Yes	6-12mnts	HC	AF
260	NEGATIVE	NO	F	21	URBAN	Owan-West	Secondary	Farmer	Single	Muslim	Mud	1-5	WS	Yes	Yes	No	Yes	ASB	River/Stream	Dr/Bu/Jc	Yes	6-12mnts	Pharm/CS	DK
261	NEGATIVE	NO	F	21	URBAN	Etsako-East	Polytechnic	Farmer	Married	Muslim	Cement	1-5	PL	Yes	No	No	Yes	ASB	Rain	Dr/Bu/Jc	Yes	1-5 mnts	Pharm/CS	AF
262	NEGATIVE	NO	M	28	URBAN	Owan-East	Secondary	Pupil/Student	Single	Muslim	Mud	1-5	BT	No	No	No	Yes	None	River/Stream	Dr/Bu/Jc	No	NA	HSP	Herbs
263	NEGATIVE	NO	M	32	URBAN	Etsako-West	University	Artisan	Married	Christian	Cement	6-10	WS	Yes	Yes	No	Yes	PVC	Dam/Tap	Dr/Bu/Jc	Yes	1-5 mnts	HC	DK
264	NEGATIVE	NO	M	26	RURAL	Etsako-West	Secondary	Pupil/Student	Single	Muslim	Cement	1-5	WS	No	No	No	Yes	POP	Borehole	Dr/Bu/Jc	Yes	1-5 mnts	Trad	Herbs
265	POSITIVE	NO	M	12	RURAL	Owan-East	Primary	Pupil/Student	Divorced/SP	Muslim	Mud	1-5	PL	No	Yes	No	Yes	PVC	Borehole	Tanks	Yes	1-5 mnts	Pharm/CS	C/Q
266	NEGATIVE	NO	F	26	URBAN	Etsako-Central	Polytechnic	Business	Single	Muslim	Cement	1-5	PL	Yes	No	No	Yes	POP	River/Stream	Dr/Bu/Jc	Yes	1-5 mnts	Pharm/CS	Herbs
267	NEGATIVE	YES	F	26	URBAN	Etsako-East	Secondary	Business	Married	Christian	Cement	6-10	WS	Yes	No	No	Yes	PVC	River/Stream	Dr/Bu/Jc	Yes	6-12mnts	Pharm/CS	AF
268	NEGATIVE	NO	M	26	URBAN	Owan-West	Polytechnic	Farmer	Single	Christian	Cement	6-10	PL	Yes	Yes	No	Yes	POP	Borehole	Dr/Bu/Jc	Yes	1-5 mnts	Pharm/CS	DK
269	NEGATIVE	NO	M	26	URBAN	Etsako-West	Secondary	Farmer	Single	Christian	Cement	1-5	WS	Yes	Yes	No	Yes	ASB	Rain	Tanks	Yes	1-5 mnts	HC	AF
270	NEGATIVE	NO	M	23	URBAN	Etsako-Central	University	Unemployed	Single	Christian	Mud	1-5	WS	No	Yes	No	Yes	Ply/Plas	River/Stream	Dr/Bu/Jc	Yes	6-12mnts	Pharm/CS	AF
271	NEGATIVE	NO	M	22	URBAN	Owan-West	Secondary	Pupil/Student	Single	Christian	Cement	6-10	WS	No	Yes	No	No	None	River/Stream	Dr/Bu/Jc	Yes	1-5 mnts	Pharm/CS	AF
272	NEGATIVE	NO	F	29	URBAN	Akoko-Edo	Polytechnic	Farmer	Married	Christian	Cement	1-5	WS	Yes	No	No	No	PVC	Borehole	Dr/Bu/Jc	Yes	6-12mnts	Pharm/CS	DK
273	NEGATIVE	NO	F	30	URBAN	Owan-West	Secondary	Farmer	Married	Christian	Cement	6-10	PL	No	No	No	Yes	None	River/Stream	Dr/Bu/Jc	Yes	1-5 mnts	Pharm/CS	AF
274	NEGATIVE	NO	F	35	URBAN	Owan-East	Polytechnic	Artisan	Married	Muslim	Cement	1-5	WS	No	Yes	No	Yes	ASB	Borehole	Dr/Bu/Jc	Yes	1-5 mnts	Trad	C/Q
275	NEGATIVE	NO	M	24	URBAN	Akoko-Edo	Primary	Farmer	Single	Muslim	Cement	6-10	WS	Yes	Yes	No	Yes	POP	Rain	Dr/Bu/Jc	Yes	6-12mnts	HSP	DK
276	POSITIVE	NO	F	9	RURAL	Etsako-West	Polytechnic	Farmer	Single	Christian	Mud	Above 10	PL	Yes	Yes	No	No	PVC	Rain	Dr/Bu/Jc	Yes	1-5 mnts	Pharm/CS	AF
277	NEGATIVE	NO	F	25	RURAL	Owan-East	Secondary	Farmer	Married	Muslim	Cement	6-10	WS	Yes	No	No	Yes	None	River/Stream	Dr/Bu/Jc	Yes	1-5 mnts	HC	DK
278	NEGATIVE	NO	M	29	RURAL	Etsako-West	Polytechnic	Pupil/Student	Single	Muslim	Mud	1-5	BT	Yes	Yes	No	Yes	PVC	Borehole	Tanks	Yes	1-5 mnts	Trad	DK
279	NEGATIVE	NO	F	34	RURAL	Owan-West	Secondary	Pupil/Student	Married	Christian	Mud	6-10	WS	Yes	Yes	No	Yes	PVC	River/Stream	Dr/Bu/Jc	Yes	1-5 mnts	Trad	AF
280	POSITIVE	NO	M	7	RURAL	Etsako-Central	No Education	Artisan	Single	Christian	Cement	6-10	PL	Yes	Yes	Yes	Yes	ASB	River/Stream	Dr/Bu/Jc	Yes	1 yr above	HC	DK
281	NEGATIVE	NO	M	30	RURAL	Etsako-Central	Polytechnic	Farmer	Married	Christian	Cement	1-5	WS	Yes	No	No	Yes	None	River/Stream	Dr/Bu/Jc	Yes	6-12mnts	Trad	AF
282	NEGATIVE	NO	M	33	RURAL	Etsako-East	Polytechnic	Farmer	Married	Christian	Cement	1-5	PL	Yes	No	No	Yes	ASB	Rain	Dr/Bu/Jc	Yes	6-12mnts	Pharm/CS	AF
283	NEGATIVE	NO	F	27	RURAL	Owan-West	Secondary	Farmer	Single	Muslim	Cement	1-5	PL	No	Yes	No	Yes	ASB	Borehole	Dr/Bu/Jc	Yes	1-5 mnts	HC	DK
284	POSITIVE	NO	M	11	RURAL	Owan-East	COE	Pupil/Student	Divorced/SP	Muslim	Cement	Above 10	WS	No	Yes	No	Yes	ASB	Dam/Tap	Dr/Bu/Jc	No	NA	HC	C/Q
285	NEGATIVE	NO	M	27	RURAL	Owan-East	Polytechnic	Artisan	Single	Christian	Cement	1-5	WS	No	No	No	No	PVC	Rain	Dr/Bu/Jc	Yes	1-5 mnts	Pharm/CS	AF
286	NEGATIVE	NO	F	33	RURAL	Etsako-Central	Polytechnic	Unemployed	Married	Muslim	Cement	1-5	WS	Yes	Yes	No	Yes	PVC	Rain	Dr/Bu/Jc	Yes	6-12mnts	HC	AF
287	NEGATIVE	NO	F	33	RURAL	Owan-West	Secondary	Artisan	Married	Christian	Cement	6-10	BT	Yes	Yes	No	Yes	ASB	Borehole	Dr/Bu/Jc	Yes	6-12mnts	HC	AF
288	NEGATIVE	NO	M	20	RURAL	Etsako-West	Polytechnic	Artisan	Single	Christian	Cement	6-10	WS	Yes	No	No	Yes	ASB	River/Stream	Dr/Bu/Jc	Yes	1-5 mnts	Pharm/CS	AF
289	NEGATIVE	NO	M	29	RURAL	Etsako-East	No Education	Business	Single	Christian	Mud	6-10	BT	No	No	No	Yes	POP	River/Stream	Tanks	Yes	6-12mnts	Pharm/CS	DK
290	NEGATIVE	NO	F	29	RURAL	Owan-West	Polytechnic	Farmer	Widow(er)	Christian	Mud	1-5	WS	Yes	No	No	Yes	PVC	Borehole	Tanks	Yes	6-12mnts	HSP	AF
291	NEGATIVE	NO	M	30	RURAL	Owan-East	Secondary	Pupil/Student	Divorced/SP	Christian	Cement	6-10	WS	Yes	Yes	No	Yes	PVC	River/Stream	Tanks	Yes	1-5 mnts	Pharm/CS	AF
292	NEGATIVE	NO	F	26	RURAL	Etsako-Central	Secondary	Unemployed	Single	Christian	Cement	1-5	PL	Yes	Yes	No	Yes	PVC	Rain	Dr/Bu/Jc	Yes	1-5 mnts	HC	AF
293	NEGATIVE	NO	M	18	RURAL	Owan-West	University	Farmer	Single	Christian	Cement	6-10	BT	Yes	Yes	Yes	Yes	PVC	River/Stream	Dr/Bu/Jc	Yes	6-12mnts	Pharm/CS	DK
294	NEGATIVE	NO	F	17	RURAL	Owan-East	Polytechnic	Farmer	Married	Christian	Mud	1-5	WS	Yes	No	No	Yes	PVC	Borehole	Dr/Bu/Jc	Yes	6-12mnts	Trad	Herbs
295	NEGATIVE	NO	F	15	RURAL	Etsako-Central	Primary	Farmer	Single	Christian	Cement	1-5	WS	No	No	No	Yes	Ply/Plas	River/Stream	Dr/Bu/Jc	Yes	1-5 mnts	Trad	AF
296	NEGATIVE	NO	F	15	RURAL	Owan-West	University	Unemployed	Single	Christian	Cement	1-5	WS	Yes	Yes	No	No	None	Dam/Tap	Dr/Bu/Jc	Yes	1 yr above	HC	DK
297	NEGATIVE	NO	M	13	RURAL	Etsako-West	Polytechnic	Civil Servant	Single	Christian	Cement	1-5	PL	Yes	Yes	No	Yes	PVC	River/Stream	Dr/Bu/Jc	Yes	1-5 mnts	HC	AF
298	NEGATIVE	NO	M	15	RURAL	Akoko-Edo	Secondary	Farmer	Single	Christian	Mud	6-10	PL	Yes	Yes	No	Yes	ASB	Borehole	Tanks	Yes	1-5 mnts	HC	C/Q
299	POSITIVE	NO	M	9	RURAL	Etsako-West	Primary	Business	Single	Christian	Mud	1-5	PL	No	Yes	No	Yes	ASB	Rain	Dr/Bu/Jc	Yes	1-5 mnts	Pharm/CS	DK
300	POSITIVE	NO	M	7	RURAL	Etsako-East	COE	Pupil/Student	Single	Muslim	Cement	Above 10	BT	Yes	Yes	No	No	ASB	Dam/Tap	Tanks	Yes	1-5 mnts	HSP	AF
301	NEGATIVE	NO	F	16	RURAL	Owan-East	Polytechnic	Artisan	Single	Christian	Cement	1-5	WS	No	No	No	Yes	ASB	Rain	Dr/Bu/Jc	Yes	6-12mnts	HC	AF
302	NEGATIVE	NO	F	15	RURAL	Owan-West	Secondary	Farmer	Single	Muslim	Cement	1-5	WS	Yes	No	No	Yes	POP	River/Stream	Dr/Bu/Jc	Yes	1-5 mnts	Pharm/CS	Herbs
303	NEGATIVE	YES	F	18	RURAL	Etsako-Central	Polytechnic	Artisan	Married	Muslim	Mud	1-5	WS	Yes	Yes	No	Yes	PVC	River/Stream	Dr/Bu/Jc	Yes	6-12mnts	Pharm/CS	DK
304	NEGATIVE	NO	F	16	RURAL	Etsako-West	Secondary	Farmer	Single	Muslim	Cement	6-10	PL	Yes	Yes	No	Yes	None	River/Stream	Dr/Bu/Jc	Yes	6-12mnts	Pharm/CS	DK
305	NEGATIVE	NO	M	17	RURAL	Etsako-East	University	Farmer	Single	Christian	Cement	1-5	WS	Yes	Yes	No	Yes	None	Rain	Dr/Bu/Jc	Yes	6-12mnts	HSP	DK
306	POSITIVE	NO	M	9	RURAL	Owan-East	No Education	Pupil/Student	Single	Christian	Mud	6-10	WS	Yes	Yes	Yes	No	None	Borehole	Dr/Bu/Jc	Yes	1-5 mnts	Trad	AF
307	NEGATIVE	NO	M	28	RURAL	Owan-East	No Education	Artisan	Single	Christian	Mud	6-10	PL	Yes	Yes	No	Yes	ASB	Borehole	Dr/Bu/Jc	Yes	1-5 mnts	Trad	AF
308	POSITIVE	NO	M	7	RURAL	Owan-West	Secondary	Civil Servant	Single	Christian	Cement	6-10	WS	Yes	No	No	No	Ply/Plas	River/Stream	Dr/Bu/Jc	Yes	6-12mnts	Pharm/CS	AF
309	NEGATIVE	NO	F	34	RURAL	Etsako-West	Secondary	Artisan	Married	Christian	Mud	1-5	WS	Yes	No	No	Yes	PVC	River/Stream	Tanks	Yes	6-12mnts	HC	AF
310	NEGATIVE	NO	M	28	RURAL	Akoko-Edo	Polytechnic	Farmer	Single	Christian	Cement	1-5	WS	Yes	Yes	No	Yes	None	River/Stream	Dr/Bu/Jc	Yes	6-12mnts	HC	AF
311	NEGATIVE	YES	M	22	RURAL	Etsako-East	Secondary	Pupil/Student	Single	Christian	Cement	6-10	WS	Yes	Yes	No	Yes	None	River/Stream	Dr/Bu/Jc	Yes	1-5 mnts	Pharm/CS	DK
312	POSITIVE	NO	M	7	RURAL	Etsako-West	COE	Pupil/Student	Single	Christian	Mud	Above 10	BT	No	Yes	No	Yes	PVC	River/Stream	Dr/Bu/Jc	No	NA	HC	C/Q
313	NEGATIVE	NO	M	14	RURAL	Owan-West	Polytechnic	Farmer	Single	Christian	Cement	1-5	BT	Yes	Yes	No	Yes	Ply/Plas	Borehole	Dr/Bu/Jc	Yes	1-5 mnts	Pharm/CS	AF
314	NEGATIVE	NO	F	17	RURAL	Etsako-West	Primary	Farmer	Married	Christian	Cement	6-10	WS	No	No	No	Yes	PVC	Rain	Dr/Bu/Jc	Yes	1-5 mnts	Trad	AF
315	NEGATIVE	NO	F	13	RURAL	Etsako-Central	Secondary	Pupil/Student	Single	Christian	Cement	1-5	WS	Yes	Yes	No	Yes	PVC	Rain	Dr/Bu/Jc	Yes	6-12mnts	Pharm/CS	Herbs
316	NEGATIVE	NO	F	19	RURAL	Owan-East	University	Pupil/Student	Single	Christian	Cement	1-5	PL	No	Yes	No	Yes	PVC	Rain	Tanks	Yes	6-12mnts	HC	Herbs
317	NEGATIVE	YES	M	15	RURAL	Etsako-West	No Education	Farmer	Single	Christian	Mud	1-5	BT	No	Yes	No	Yes	PVC	Rain	Tanks	Yes	1-5 mnts	HC	Herbs
318	NEGATIVE	NO	F	14	RURAL	Etsako-Central	Polytechnic	Farmer	Single	Christian	Cement	1-5	WS	Yes	Yes	No	Yes	POP	River/Stream	Tanks	Yes	6-12mnts	Pharm/CS	Herbs
319	NEGATIVE	NO	F	13	RURAL	Etsako-East	Polytechnic	Artisan	Single	Christian	Cement	6-10	WS	Yes	No	No	Yes	ASB	Borehole	Dr/Bu/Jc	Yes	6-12mnts	Pharm/CS	DK
320	NEGATIVE	NO	M	16	RURAL	Owan-West	Secondary	Civil Servant	Single	Christian	Cement	1-5	BT	Yes	No	No	Yes	None	River/Stream	Dr/Bu/Jc	Yes	6-12mnts	HC	AF
321	POSITIVE	NO	M	7	RURAL	Owan-West	No Education	Farmer	Single	Muslim	Cement	1-5	PL	No	Yes	Yes	Yes	ASB	River/Stream	Dr/Bu/Jc	Yes	1-5 mnts	HSP	AF
322	NEGATIVE	NO	F	15	RURAL	Owan-East	Polytechnic	Farmer	Single	Muslim	Cement	6-10	WS	Yes	Yes	No	Yes	PVC	River/Stream	Dr/Bu/Jc	Yes	1-5 mnts	HSP	AF
323	NEGATIVE	NO	M	14	RURAL	Etsako-West	Secondary	Business	Single	Muslim	Cement	1-5	WS	Yes	No	No	Yes	None	Borehole	Dr/Bu/Jc	Yes	6-12mnts	HC	AF
324	NEGATIVE	NO	F	16	RURAL	Etsako-East	University	Artisan	Single	Christian	Mud	1-5	WS	Yes	No	No	No	POP	Rain	Dr/Bu/Jc	Yes	6-12mnts	HC	AF
325	POSITIVE	NO	M	5	RURAL	Owan-East	Secondary	Civil Servant	Single	Muslim	Cement	Above 10	PL	Yes	Yes	No	Yes	None	Borehole	Tanks	Yes	1-5 mnts	HC	AF
326	NEGATIVE	NO	M	30	RURAL	Owan-West	Secondary	Pupil/Student	Married	Muslim	Cement	1-5	PL	Yes	Yes	Yes	Yes	PVC	Dam/Tap	Dr/Bu/Jc	Yes	1-5 mnts	HC	AF
327	NEGATIVE	NO	M	21	RURAL	Etsako-Central	University	Civil Servant	Single	Muslim	Cement	1-5	WS	No	Yes	No	Yes	POP	Borehole	Dr/Bu/Jc	Yes	1-5 mnts	Pharm/CS	AF
328	NEGATIVE	NO	F	26	RURAL	Owan-West	Secondary	Pupil/Student	Married	Christian	Cement	6-10	WS	Yes	Yes	No	Yes	POP	River/Stream	Dr/Bu/Jc	Yes	6-12mnts	Pharm/CS	AF
329	NEGATIVE	NO	M	24	RURAL	Etsako-East	Polytechnic	Artisan	Single	Christian	Cement	1-5	WS	No	Yes	No	Yes	ASB	River/Stream	Dr/Bu/Jc	Yes	6-12mnts	Trad	AF
330	NEGATIVE	NO	M	25	RURAL	Owan-West	Primary	Farmer	Single	Christian	Cement	6-10	WS	Yes	No	No	Yes	PVC	Rain	Tanks	Yes	6-12mnts	Pharm/CS	AF
331	NEGATIVE	NO	F	30	RURAL	Owan-East	Polytechnic	Farmer	Single	Christian	Cement	1-5	PL	Yes	No	No	Yes	ASB	River/Stream	Tanks	Yes	6-12mnts	HC	Herbs
332	NEGATIVE	NO	M	34	RURAL	Etsako-Central	Secondary	Artisan	Married	Christian	Cement	1-5	BT	Yes	Yes	No	Yes	ASB	River/Stream	Tanks	Yes	6-12mnts	HC	AF
333	NEGATIVE	NO	M	21	RURAL	Etsako-East	Polytechnic	Pupil/Student	Single	Christian	Cement	1-5	WS	Yes	No	No	Yes	PVC	Borehole	Dr/Bu/Jc	Yes	6-12mnts	Pharm/CS	DK
334	NEGATIVE	YES	M	25	RURAL	Owan-West	No Education	Unemployed	Married	Christian	Cement	6-10	WS	Yes	No	No	Yes	PVC	River/Stream	Dr/Bu/Jc	Yes	1-5 mnts	HSP	AF
335	NEGATIVE	NO	F	27	RURAL	Akoko-Edo	Polytechnic	Farmer	Single	Muslim	Cement	1-5	WS	Yes	Yes	No	Yes	PVC	Rain	Tanks	Yes	6-12mnts	HC	AF
336	NEGATIVE	NO	F	27	RURAL	Etsako-Central	Primary	Farmer	Single	Muslim	Mud	1-5	WS	Yes	No	No	Yes	ASB	River/Stream	Dr/Bu/Jc	Yes	6-12mnts	HC	AF
337	NEGATIVE	NO	F	24	RURAL	Owan-East	Secondary	Artisan	Married	Christian	Mud	1-5	PL	Yes	No	No	Yes	POP	River/Stream	Dr/Bu/Jc	Yes	6-12mnts	Pharm/CS	C/Q
338	NEGATIVE	NO	F	31	RURAL	Etsako-East	Polytechnic	Artisan	Married	Christian	Cement	1-5	PL	No	Yes	No	Yes	PVC	Borehole	Tanks	Yes	6-12mnts	Pharm/CS	AF
339	NEGATIVE	NO	F	23	RURAL	Etsako-West	Secondary	Farmer	Married	Christian	Cement	1-5	WS	Yes	No	No	No	PVC	River/Stream	Dr/Bu/Jc	Yes	1-5 mnts	HC	AF
340	NEGATIVE	NO	M	33	RURAL	Etsako-Central	University	Business	Married	Christian	Cement	6-10	WS	No	No	No	Yes	None	Rain	Dr/Bu/Jc	Yes	6-12mnts	Pharm/CS	AF
341	NEGATIVE	NO	M	13	RURAL	Owan-West	Polytechnic	Farmer	Single	Muslim	Cement	6-10	WS	No	Yes	No	Yes	Ply/Plas	Rain	Dr/Bu/Jc	Yes	6-12mnts	Pharm/CS	DK
342	NEGATIVE	NO	M	15	RURAL	Owan-East	Secondary	Artisan	Single	Christian	Cement	1-5	WS	Yes	Yes	No	Yes	None	Borehole	Dr/Bu/Jc	Yes	1-5 mnts	Pharm/CS	Herbs
343	NEGATIVE	NO	M	16	RURAL	Etsako-Central	Secondary	Civil Servant	Single	Muslim	Mud	6-10	WS	Yes	Yes	No	Yes	PVC	Rain	Tanks	Yes	6-12mnts	Trad	AF
344	NEGATIVE	NO	M	16	RURAL	Owan-West	University	Farmer	Single	Muslim	Cement	1-5	PL	Yes	No	No	Yes	ASB	Rain	Dr/Bu/Jc	Yes	6-12mnts	HC	AF
345	NEGATIVE	NO	F	17	RURAL	Etsako-East	Secondary	Farmer	Married	Muslim	Cement	6-10	WS	Yes	No	No	Yes	None	Borehole	Dr/Bu/Jc	Yes	6-12mnts	Pharm/CS	AF
346	POSITIVE	NO	M	8	RURAL	Etsako-West	University	Pupil/Student	Single	Christian	Mud	6-10	PL	Yes	Yes	No	Yes	ASB	Dam/Tap	Dr/Bu/Jc	Yes	6-12mnts	Trad	AF
347	NEGATIVE	NO	F	15	RURAL	Owan-West	Polytechnic	Farmer	Single	Christian	Cement	6-10	BT	Yes	Yes	No	Yes	POP	River/Stream	Dr/Bu/Jc	Yes	6-12mnts	HSP	AF
348	NEGATIVE	NO	F	18	RURAL	Akoko-Edo	No Education	Unemployed	Married	Christian	Cement	1-5	WS	Yes	Yes	No	Yes	PVC	River/Stream	Tanks	Yes	6-12mnts	Pharm/CS	C/Q
349	NEGATIVE	NO	M	17	RURAL	Etsako-East	Secondary	Pupil/Student	Single	Christian	Cement	6-10	WS	No	Yes	No	Yes	PVC	Borehole	Dr/Bu/Jc	Yes	6-12mnts	Pharm/CS	AF
350	NEGATIVE	NO	M	14	RURAL	Etsako-West	University	Civil Servant	Single	Christian	Cement	1-5	PL	Yes	Yes	No	Yes	PVC	River/Stream	Dr/Bu/Jc	Yes	1 yr above	Trad	AF
351	NEGATIVE	NO	F	14	RURAL	Akoko-Edo	Secondary	Artisan	Single	Christian	Cement	6-10	PL	No	No	No	Yes	PVC	Rain	Dr/Bu/Jc	Yes	1-5 mnts	HC	DK
352	NEGATIVE	NO	M	15	RURAL	Akoko-Edo	Polytechnic	Artisan	Single	Christian	Cement	6-10	WS	No	Yes	No	Yes	Ply/Plas	Borehole	Tanks	Yes	1-5 mnts	Pharm/CS	DK
353	NEGATIVE	NO	F	17	RURAL	Owan-West	Polytechnic	Farmer	Married	Christian	Mud	1-5	WS	Yes	No	No	Yes	ASB	River/Stream	Tanks	Yes	6-12mnts	Pharm/CS	DK
354	NEGATIVE	NO	M	15	RURAL	Owan-West	Secondary	Pupil/Student	Single	Christian	Cement	6-10	WS	No	No	No	No	PVC	Dam/Tap	Tanks	Yes	6-12mnts	Pharm/CS	DK
355	NEGATIVE	NO	F	14	RURAL	Etsako-East	Polytechnic	Unemployed	Single	Christian	Cement	1-5	WS	Yes	Yes	No	Yes	None	Borehole	Tanks	Yes	6-12mnts	HC	Herbs
356	NEGATIVE	NO	F	18	RURAL	Owan-East	Primary	Artisan	Married	Christian	Cement	6-10	PL	Yes	No	No	Yes	Ply/Plas	River/Stream	Dr/Bu/Jc	Yes	6-12mnts	Pharm/CS	AF
357	NEGATIVE	NO	F	19	RURAL	Owan-East	University	Artisan	Married	Muslim	Cement	6-10	BT	Yes	No	No	Yes	ASB	River/Stream	Dr/Bu/Jc	Yes	6-12mnts	Trad	AF
358	POSITIVE	NO	M	11	RURAL	Etsako-East	No Education	Business	Divorced/SP	Muslim	Cement	6-10	PL	No	Yes	No	Yes	PVC	River/Stream	Dr/Bu/Jc	Yes	1-5 mnts	Pharm/CS	Herbs
359	NEGATIVE	NO	M	21	RURAL	Etsako-Central	Secondary	Farmer	Single	Christian	Cement	1-5	WS	Yes	Yes	No	Yes	PVC	Rain	Dr/Bu/Jc	Yes	6-12mnts	Trad	AF
360	NEGATIVE	NO	F	34	RURAL	Owan-West	Polytechnic	Artisan	Married	Christian	Cement	1-5	WS	Yes	No	No	Yes	ASB	Borehole	Dr/Bu/Jc	Yes	6-12mnts	HC	AF
361	NEGATIVE	NO	M	28	RURAL	Etsako-West	No Education	Pupil/Student	Married	Christian	Cement	6-10	BT	Yes	No	No	Yes	ASB	Borehole	Tanks	Yes	6-12mnts	HC	AF
362	NEGATIVE	NO	F	34	RURAL	Etsako-Central	Polytechnic	Farmer	Married	Christian	Cement	Above 10	BT	Yes	Yes	No	Yes	Ply/Plas	River/Stream	Dr/Bu/Jc	Yes	6-12mnts	HSP	AF
363	POSITIVE	NO	M	8	RURAL	Owan-East	COE	Unemployed	Single	Muslim	Cement	Above 10	BT	Yes	No	Yes	Yes	ASB	Rain	Tanks	Yes	1 yr above	HC	C/Q
364	NEGATIVE	NO	F	27	RURAL	Akoko-Edo	Secondary	Pupil/Student	Single	Christian	Cement	1-5	WS	Yes	No	No	Yes	PVC	River/Stream	Dr/Bu/Jc	Yes	6-12mnts	HC	AF
365	NEGATIVE	NO	M	29	RURAL	Owan-West	Polytechnic	Pupil/Student	Single	Christian	Mud	1-5	BT	No	No	No	Yes	ASB	Borehole	Dr/Bu/Jc	Yes	1-5 mnts	Trad	Herbs
366	NEGATIVE	NO	F	22	RURAL	Etsako-Central	Primary	Business	Married	Christian	Mud	6-10	WS	No	Yes	No	Yes	None	River/Stream	Dr/Bu/Jc	Yes	6-12mnts	Pharm/CS	DK
367	POSITIVE	NO	F	5	RURAL	Etsako-West	No Education	Pupil/Student	Single	Christian	Mud	1-5	BT	Yes	No	No	No	None	River/Stream	Dr/Bu/Jc	Yes	1-5 mnts	HSP	AF
368	NEGATIVE	NO	F	28	RURAL	Owan-West	Polytechnic	Farmer	Married	Christian	Cement	Above 10	WS	Yes	Yes	No	Yes	None	Rain	Tanks	Yes	6-12mnts	Pharm/CS	DK
369	NEGATIVE	NO	F	26	RURAL	Etsako-Central	Secondary	Pupil/Student	Married	Christian	Cement	1-5	WS	Yes	Yes	No	Yes	PVC	River/Stream	Dr/Bu/Jc	Yes	6-12mnts	HC	DK
370	NEGATIVE	YES	M	35	RURAL	Owan-East	University	Artisan	Married	Christian	Cement	1-5	WS	Yes	Yes	Yes	Yes	PVC	Dam/Tap	Dr/Bu/Jc	No	NA	Trad	Herbs
371	NEGATIVE	NO	F	15	RURAL	Akoko-Edo	Polytechnic	Artisan	Single	Christian	Mud	1-5	BT	Yes	Yes	No	Yes	PVC	River/Stream	Tanks	Yes	6-12mnts	Pharm/CS	Herbs
372	NEGATIVE	NO	F	15	RURAL	Owan-East	No Education	Unemployed	Single	Christian	Mud	1-5	WS	Yes	Yes	No	Yes	None	Rain	Dr/Bu/Jc	Yes	1-5 mnts	HC	AF
373	NEGATIVE	NO	M	14	RURAL	Etsako-West	Secondary	Farmer	Single	Christian	Cement	1-5	PL	Yes	Yes	No	Yes	None	River/Stream	Dr/Bu/Jc	Yes	6-12mnts	HC	AF
374	NEGATIVE	NO	M	13	RURAL	Etsako-Central	University	Farmer	Single	Muslim	Cement	Above 10	WS	No	No	No	Yes	PVC	Borehole	Dr/Bu/Jc	Yes	6-12mnts	HC	AF
375	NEGATIVE	NO	F	17	RURAL	Owan-West	Polytechnic	Artisan	Married	Muslim	Cement	6-10	WS	Yes	No	No	No	POP	River/Stream	Tanks	Yes	6-12mnts	Pharm/CS	Herbs
376	NEGATIVE	NO	M	17	RURAL	Etsako-East	Secondary	Pupil/Student	Single	Muslim	Cement	1-5	PL	Yes	Yes	No	Yes	ASB	River/Stream	Dr/Bu/Jc	Yes	6-12mnts	Pharm/CS	Herbs
377	POSITIVE	NO	F	10	RURAL	Owan-West	COE	Farmer	Single	Christian	Cement	Above 10	PL	Yes	Yes	No	No	ASB	River/Stream	Dr/Bu/Jc	Yes	6-12mnts	HC	AF
378	NEGATIVE	NO	M	15	RURAL	Owan-West	Polytechnic	Farmer	Single	Muslim	Mud	1-5	BT	Yes	No	No	Yes	Ply/Plas	Rain	Dr/Bu/Jc	Yes	6-12mnts	Trad	AF
379	NEGATIVE	NO	M	13	RURAL	Akoko-Edo	Secondary	Pupil/Student	Single	Muslim	Cement	1-5	WS	Yes	Yes	No	Yes	PVC	River/Stream	Tanks	Yes	6-12mnts	HSP	AF
380	NEGATIVE	NO	F	14	RURAL	Owan-West	University	Artisan	Single	Muslim	Cement	6-10	WS	Yes	Yes	No	Yes	None	River/Stream	Dr/Bu/Jc	Yes	1-5 mnts	Pharm/CS	C/Q
381	NEGATIVE	YES	M	16	RURAL	Etsako-West	Secondary	Pupil/Student	Single	Christian	Mud	1-5	WS	No	Yes	No	Yes	None	Borehole	Dr/Bu/Jc	Yes	6-12mnts	Pharm/CS	AF
382	NEGATIVE	NO	M	17	RURAL	Etsako-Central	Secondary	Farmer	Single	Christian	Cement	6-10	WS	Yes	Yes	No	Yes	PVC	River/Stream	Dr/Bu/Jc	Yes	6-12mnts	HC	DK
383	POSITIVE	NO	M	6	RURAL	Owan-East	No Education	Pupil/Student	Single	Christian	Cement	6-10	BT	No	Yes	Yes	Yes	POP	Rain	Dr/Bu/Jc	No	NA	Trad	AF
384	NEGATIVE	NO	M	18	RURAL	Owan-West	Primary	Pupil/Student	Single	Christian	Cement	6-10	WS	No	Yes	No	Yes	None	Rain	Tanks	Yes	1-5 mnts	HC	Herbs
385	NEGATIVE	NO	M	16	RURAL	Etsako-East	Polytechnic	Pupil/Student	Single	Christian	Cement	6-10	PL	Yes	No	No	Yes	ASB	River/Stream	Dr/Bu/Jc	Yes	1-5 mnts	HC	AF
386	NEGATIVE	NO	M	17	RURAL	Owan-West	Primary	Artisan	Single	Christian	Cement	1-5	PL	Yes	No	No	Yes	Ply/Plas	River/Stream	Dr/Bu/Jc	Yes	1-5 mnts	Trad	AF
387	NEGATIVE	NO	F	18	RURAL	Akoko-Edo	Secondary	Farmer	Married	Muslim	Cement	6-10	WS	Yes	No	No	Yes	PVC	Dam/Tap	Dr/Bu/Jc	Yes	1 yr above	Pharm/CS	AF
388	NEGATIVE	NO	F	16	RURAL	Owan-West	No Education	Artisan	Single	Christian	Cement	6-10	WS	Yes	Yes	No	Yes	None	Rain	Tanks	Yes	1-5 mnts	HC	Herbs
389	NEGATIVE	NO	M	34	RURAL	Etsako-West	University	Farmer	Married	Traditional	Cement	6-10	WS	Yes	Yes	No	Yes	None	Borehole	Dr/Bu/Jc	Yes	1-5 mnts	Pharm/CS	AF
390	NEGATIVE	NO	F	28	URBAN	Akoko-Edo	Secondary	Business	Single	Christian	Cement	1-5	WS	No	Yes	No	Yes	ASB	Rain	Dr/Bu/Jc	Yes	1-5 mnts	Pharm/CS	AF
391	NEGATIVE	NO	F	20	URBAN	Akoko-Edo	Polytechnic	Unemployed	Single	Christian	Mud	6-10	WS	Yes	Yes	No	Yes	PVC	Rain	Dr/Bu/Jc	Yes	6-12mnts	Trad	AF
392	NEGATIVE	NO	F	34	URBAN	Owan-East	Secondary	Farmer	Married	Christian	Cement	6-10	WS	Yes	No	No	Yes	PVC	Rain	Tanks	Yes	6-12mnts	HC	Herbs
393	NEGATIVE	NO	M	28	URBAN	Owan-East	Polytechnic	Farmer	Single	Christian	Mud	6-10	WS	No	Yes	No	No	PVC	River/Stream	Tanks	Yes	6-12mnts	HSP	AF
394	NEGATIVE	NO	F	27	URBAN	Etsako-East	No Education	Unemployed	Single	Christian	Cement	1-5	WS	Yes	No	No	Yes	PVC	River/Stream	Tanks	Yes	1-5 mnts	Pharm/CS	DK
395	NEGATIVE	NO	F	28	URBAN	Owan-West	Secondary	Civil Servant	Single	Christian	Cement	1-5	PL	Yes	No	No	Yes	POP	River/Stream	Dr/Bu/Jc	Yes	6-12mnts	Pharm/CS	DK
396	NEGATIVE	NO	F	32	URBAN	Owan-East	Secondary	Pupil/Student	Married	Christian	Cement	1-5	WS	Yes	Yes	No	Yes	ASB	Rain	Dr/Bu/Jc	Yes	6-12mnts	Pharm/CS	AF
397	NEGATIVE	NO	F	32	URBAN	Etsako-Central	Polytechnic	Artisan	Married	Christian	Cement	1-5	PL	No	Yes	No	Yes	PVC	Borehole	Tanks	Yes	6-12mnts	HC	AF
398	NEGATIVE	NO	M	32	URBAN	Etsako-East	Secondary	Farmer	Married	Christian	Cement	1-5	WS	No	Yes	No	Yes	ASB	Borehole	Dr/Bu/Jc	Yes	1-5 mnts	Pharm/CS	Herbs
399	NEGATIVE	NO	M	22	URBAN	Owan-East	Polytechnic	Farmer	Single	Muslim	Cement	Above 10	WS	Yes	Yes	No	Yes	Ply/Plas	River/Stream	Dr/Bu/Jc	Yes	1-5 mnts	Trad	DK
400	NEGATIVE	NO	F	26	URBAN	Etsako-West	Secondary	Farmer	Married	Christian	Cement	6-10	BT	Yes	Yes	No	Yes	Ply/Plas	River/Stream	Dr/Bu/Jc	Yes	1-5 mnts	Trad	AF
401	NEGATIVE	NO	M	28	URBAN	Etsako-East	University	Pupil/Student	Single	Christian	Mud	6-10	WS	Yes	Yes	No	Yes	ASB	River/Stream	Tanks	Yes	6-12mnts	Pharm/CS	C/Q
402	POSITIVE	NO	M	10	RURAL	Etsako-East	COE	Artisan	Divorced/SP	Christian	Cement	Above 10	PL	Yes	Yes	No	Yes	ASB	Borehole	Claypots	Yes	1-5 mnts	Trad	Herbs
403	POSITIVE	NO	F	8	RURAL	Etsako-West	Primary	Civil Servant	Single	Christian	Mud	6-10	BT	No	Yes	No	Yes	PVC	Dam/Tap	Dr/Bu/Jc	Yes	1-5 mnts	HSP	C/Q
404	NEGATIVE	NO	M	29	URBAN	Owan-West	Primary	Artisan	Single	Muslim	Mud	1-5	WS	Yes	No	No	Yes	None	River/Stream	Dr/Bu/Jc	Yes	6-12mnts	Pharm/CS	AF
405	NEGATIVE	NO	M	34	URBAN	Etsako-West	Polytechnic	Farmer	Married	Christian	Cement	1-5	BT	Yes	No	No	Yes	None	River/Stream	Dr/Bu/Jc	Yes	6-12mnts	HC	AF
406	NEGATIVE	NO	M	32	URBAN	Etsako-Central	Secondary	Artisan	Married	Christian	Cement	1-5	WS	No	Yes	No	Yes	None	River/Stream	Dr/Bu/Jc	Yes	6-12mnts	Trad	DK
407	NEGATIVE	NO	M	23	URBAN	Owan-East	University	Pupil/Student	Married	Christian	Cement	6-10	WS	Yes	Yes	No	Yes	ASB	Dam/Tap	Tanks	Yes	6-12mnts	Trad	AF
408	POSITIVE	NO	F	15	RURAL	Akoko-Edo	Secondary	Pupil/Student	Married	Christian	Cement	Above 10	PL	Yes	Yes	No	Yes	Ply/Plas	River/Stream	Tanks	Yes	1-5 mnts	HC	AF
409	NEGATIVE	NO	M	35	RURAL	Etsako-East	No Education	Farmer	Married	Muslim	Cement	Above 10	WS	No	Yes	No	Yes	None	River/Stream	Dr/Bu/Jc	Yes	1-5 mnts	Trad	Herbs
410	NEGATIVE	NO	F	27	RURAL	Owan-West	Polytechnic	Farmer	Married	Christian	Cement	6-10	WS	No	Yes	No	Yes	PVC	Borehole	Dr/Bu/Jc	Yes	6-12mnts	HC	Herbs
411	NEGATIVE	NO	F	34	RURAL	Etsako-Central	Secondary	Artisan	Married	Christian	Cement	1-5	BT	Yes	No	No	No	Ply/Plas	River/Stream	Dr/Bu/Jc	Yes	6-12mnts	HSP	Herbs
412	NEGATIVE	YES	F	29	RURAL	Owan-West	Secondary	Pupil/Student	Married	Christian	Cement	6-10	WS	Yes	No	No	No	ASB	Rain	Tanks	Yes	6-12mnts	Pharm/CS	AF
413	NEGATIVE	NO	F	28	RURAL	Etsako-East	University	Pupil/Student	Single	Muslim	Mud	6-10	WS	Yes	No	Yes	Yes	Ply/Plas	River/Stream	Dr/Bu/Jc	Yes	1-5 mnts	Pharm/CS	AF
414	NEGATIVE	YES	M	21	RURAL	Owan-West	No Education	Farmer	Single	Muslim	Mud	6-10	WS	Yes	Yes	No	Yes	PVC	River/Stream	Dr/Bu/Jc	Yes	6-12mnts	Pharm/CS	AF
415	NEGATIVE	NO	M	27	RURAL	Etsako-West	Secondary	Artisan	Married	Christian	Cement	1-5	WS	No	Yes	No	Yes	POP	Borehole	Dr/Bu/Jc	Yes	6-12mnts	Trad	Herbs
416	POSITIVE	NO	M	14	RURAL	Owan-East	No Education	Unemployed	Widow(er)	Christian	Mud	Above 10	PL	Yes	No	Yes	No	ASB	River/Stream	Dr/Bu/Jc	Yes	1-5 mnts	Pharm/CS	Herbs
417	NEGATIVE	NO	F	25	RURAL	Owan-West	Polytechnic	Business	Single	Christian	Cement	Above 10	PL	No	Yes	No	Yes	POP	River/Stream	Tanks	Yes	6-12mnts	Pharm/CS	DK
418	NEGATIVE	NO	F	31	RURAL	Etsako-Central	Secondary	Artisan	Married	Christian	Cement	Above 10	PL	Yes	No	No	Yes	POP	River/Stream	Dr/Bu/Jc	Yes	6-12mnts	Pharm/CS	DK
419	NEGATIVE	NO	F	23	RURAL	Etsako-East	Primary	Farmer	Married	Christian	Cement	6-10	WS	Yes	No	No	Yes	PVC	River/Stream	Dr/Bu/Jc	Yes	6-12mnts	HC	DK
420	POSITIVE	NO	M	17	RURAL	Etsako-Central	Primary	Farmer	Widow(er)	Muslim	Mud	6-10	PL	Yes	Yes	No	No	PVC	River/Stream	Dr/Bu/Jc	Yes	1 yr above	HC	Herbs
421	NEGATIVE	NO	M	29	RURAL	Owan-West	Polytechnic	Farmer	Single	Christian	Cement	6-10	WS	Yes	Yes	No	Yes	POP	Borehole	Dr/Bu/Jc	Yes	6-12mnts	Trad	DK
422	NEGATIVE	NO	M	25	RURAL	Etsako-West	Secondary	Pupil/Student	Single	Christian	Cement	1-5	WS	Yes	No	No	Yes	None	Dam/Tap	Dr/Bu/Jc	Yes	1-5 mnts	HC	AF
423	NEGATIVE	NO	F	31	RURAL	Etsako-East	Polytechnic	Pupil/Student	Married	Christian	Cement	6-10	WS	No	No	No	Yes	None	Borehole	Tanks	Yes	6-12mnts	HC	AF
424	POSITIVE	NO	M	6	RURAL	Owan-West	Primary	Artisan	Single	Christian	Cement	Above 10	PL	Yes	Yes	No	Yes	ASB	Borehole	Dr/Bu/Jc	Yes	1-5 mnts	HSP	AF
425	NEGATIVE	NO	F	31	RURAL	Owan-East	Primary	Civil Servant	Married	Muslim	Cement	6-10	WS	Yes	Yes	No	Yes	ASB	Rain	Tanks	Yes	6-12mnts	Pharm/CS	DK
426	NEGATIVE	NO	M	28	RURAL	Etsako-Central	Secondary	Pupil/Student	Single	Christian	Mud	6-10	WS	No	Yes	No	Yes	PVC	River/Stream	Tanks	Yes	6-12mnts	HSP	C/Q
427	NEGATIVE	NO	M	22	RURAL	Owan-East	Polytechnic	Artisan	Single	Christian	Cement	6-10	PL	Yes	Yes	No	Yes	ASB	River/Stream	Tanks	Yes	6-12mnts	Trad	AF
428	NEGATIVE	NO	F	22	RURAL	Owan-West	Secondary	Farmer	Married	Christian	Cement	1-5	WS	Yes	Yes	No	Yes	ASB	River/Stream	Dr/Bu/Jc	Yes	1-5 mnts	Pharm/CS	Herbs
429	NEGATIVE	NO	F	32	RURAL	Akoko-Edo	University	Farmer	Married	Christian	Cement	6-10	WS	Yes	Yes	No	No	None	Dam/Tap	Dr/Bu/Jc	Yes	6-12mnts	Trad	AF
430	POSITIVE	NO	F	6	RURAL	Etsako-West	COE	Pupil/Student	Single	Christian	Mud	Above 10	PL	Yes	Yes	No	Yes	None	Dam/Tap	Tanks	Yes	6-12mnts	Pharm/CS	AF
431	POSITIVE	NO	M	8	RURAL	Owan-West	No Education	Business	Single	Christian	Cement	1-5	BT	Yes	Yes	Yes	Yes	PVC	Rain	Dr/Bu/Jc	Yes	6-12mnts	HSP	AF
432	POSITIVE	YES	M	7	RURAL	Etsako-Central	Primary	Unemployed	Single	Muslim	Cement	Above 10	PL	Yes	No	No	Yes	ASB	River/Stream	Dr/Bu/Jc	Yes	1-5 mnts	HC	Herbs
433	NEGATIVE	NO	F	21	RURAL	Owan-West	Primary	Pupil/Student	Married	Muslim	Cement	6-10	WS	Yes	No	No	Yes	POP	River/Stream	Dr/Bu/Jc	Yes	6-12mnts	Pharm/CS	AF
434	NEGATIVE	NO	M	22	RURAL	Etsako-Central	Secondary	Pupil/Student	Single	Muslim	Cement	6-10	BT	No	No	No	Yes	Ply/Plas	River/Stream	Dr/Bu/Jc	Yes	6-12mnts	Pharm/CS	DK
435	NEGATIVE	NO	F	25	RURAL	Owan-East	Polytechnic	Farmer	Married	Christian	Cement	1-5	WS	No	Yes	No	Yes	PVC	River/Stream	Dr/Bu/Jc	Yes	6-12mnts	HC	AF
436	NEGATIVE	NO	F	22	RURAL	Etsako-East	Secondary	Pupil/Student	Single	Christian	Cement	1-5	WS	Yes	No	No	Yes	PVC	River/Stream	Dr/Bu/Jc	Yes	6-12mnts	Trad	Herbs
437	NEGATIVE	NO	M	29	RURAL	Etsako-Central	No Education	Artisan	Single	Christian	Mud	1-5	WS	Yes	No	No	Yes	PVC	River/Stream	Dr/Bu/Jc	Yes	6-12mnts	HC	DK
438	NEGATIVE	NO	M	29	RURAL	Owan-West	Secondary	Farmer	Single	Christian	Cement	6-10	WS	Yes	Yes	No	Yes	PVC	River/Stream	Tanks	Yes	1-5 mnts	HC	AF
439	POSITIVE	NO	M	6	RURAL	Etsako-West	Secondary	Farmer	Single	Christian	Mud	6-10	BT	Yes	Yes	No	Yes	ASB	Dam/Tap	Dr/Bu/Jc	Yes	1-5 mnts	Pharm/CS	AF
440	NEGATIVE	NO	M	29	RURAL	Etsako-West	Polytechnic	Farmer	Single	Muslim	Cement	6-10	WS	No	No	No	Yes	Ply/Plas	Rain	Dr/Bu/Jc	Yes	1-5 mnts	HC	AF
441	NEGATIVE	NO	M	24	RURAL	Akoko-Edo	Secondary	Farmer	Married	Muslim	Cement	1-5	WS	Yes	No	No	Yes	ASB	River/Stream	Dr/Bu/Jc	Yes	6-12mnts	HC	AF
442	NEGATIVE	NO	M	34	RURAL	Owan-East	Secondary	Artisan	Married	Christian	Cement	1-5	PL	Yes	Yes	No	Yes	ASB	River/Stream	Dr/Bu/Jc	Yes	6-12mnts	Pharm/CS	AF
443	POSITIVE	NO	M	11	RURAL	Akoko-Edo	No Education	Civil Servant	Widow(er)	Christian	Mud	6-10	PL	No	Yes	Yes	Yes	None	Rain	Tanks	Yes	1-5 mnts	Pharm/CS	AF
444	NEGATIVE	YES	M	22	URBAN	Etsako-Central	Polytechnic	Pupil/Student	Single	Christian	Cement	6-10	WS	Yes	Yes	No	Yes	ASB	River/Stream	Dr/Bu/Jc	Yes	6-12mnts	Pharm/CS	AF
445	NEGATIVE	NO	F	27	URBAN	Etsako-East	No Education	Civil Servant	Single	Christian	Cement	6-10	WS	No	Yes	No	Yes	PVC	Dam/Tap	Dr/Bu/Jc	Yes	6-12mnts	Pharm/CS	Herbs
446	NEGATIVE	NO	M	25	URBAN	Owan-West	Secondary	Farmer	Single	Muslim	Cement	6-10	PL	Yes	Yes	No	Yes	None	River/Stream	Tanks	Yes	1-5 mnts	HSP	DK
447	NEGATIVE	NO	M	30	URBAN	Owan-East	Secondary	Pupil/Student	Married	Christian	Cement	1-5	WS	Yes	Yes	No	No	None	Borehole	Dr/Bu/Jc	Yes	6-12mnts	Trad	DK
448	NEGATIVE	NO	M	33	URBAN	Etsako-West	Polytechnic	Farmer	Married	Muslim	Mud	1-5	BT	Yes	No	No	Yes	Ply/Plas	River/Stream	Dr/Bu/Jc	Yes	6-12mnts	HC	Herbs
449	NEGATIVE	NO	M	24	URBAN	Etsako-East	Secondary	Artisan	Single	Muslim	Cement	1-5	WS	No	No	No	Yes	ASB	River/Stream	Dr/Bu/Jc	Yes	6-12mnts	HC	Herbs
450	NEGATIVE	NO	M	26	URBAN	Owan-West	Secondary	Pupil/Student	Single	Christian	Mud	6-10	WS	No	No	No	Yes	PVC	River/Stream	Dr/Bu/Jc	Yes	6-12mnts	HC	DK
451	NEGATIVE	NO	M	26	URBAN	Akoko-Edo	Polytechnic	Artisan	Single	Christian	Cement	Above 10	PL	Yes	No	No	Yes	None	River/Stream	Tanks	Yes	6-12mnts	HC	AF
452	NEGATIVE	NO	F	23	URBAN	Owan-West	Primary	Unemployed	Married	Christian	Cement	6-10	PL	Yes	Yes	No	Yes	None	Dam/Tap	Dr/Bu/Jc	Yes	1-5 mnts	Pharm/CS	AF
453	NEGATIVE	NO	M	25	URBAN	Akoko-Edo	Polytechnic	Pupil/Student	Single	Christian	Mud	1-5	WS	Yes	Yes	No	Yes	ASB	River/Stream	Dr/Bu/Jc	Yes	6-12mnts	Pharm/CS	Herbs
454	NEGATIVE	NO	M	34	URBAN	Akoko-Edo	Secondary	Farmer	Married	Muslim	Cement	1-5	WS	No	Yes	No	Yes	PVC	River/Stream	Dr/Bu/Jc	Yes	6-12mnts	HC	AF
455	NEGATIVE	NO	M	27	URBAN	Owan-West	Polytechnic	Artisan	Single	Muslim	Cement	1-5	WS	No	No	No	Yes	None	River/Stream	Dr/Bu/Jc	Yes	6-12mnts	Pharm/CS	AF
456	NEGATIVE	NO	F	24	URBAN	Etsako-East	Polytechnic	Artisan	Married	Muslim	Cement	1-5	WS	Yes	Yes	No	Yes	Ply/Plas	River/Stream	Tanks	Yes	6-12mnts	HC	AF
457	NEGATIVE	NO	F	34	URBAN	Akoko-Edo	Primary	Pupil/Student	Married	Christian	Cement	6-10	WS	Yes	No	No	Yes	ASB	River/Stream	Dr/Bu/Jc	Yes	1-5 mnts	Trad	DK
458	NEGATIVE	NO	M	34	URBAN	Owan-East	Secondary	Farmer	Widow(er)	Muslim	Cement	6-10	PL	Yes	No	No	Yes	ASB	Dam/Tap	Dr/Bu/Jc	Yes	6-12mnts	Pharm/CS	DK
459	NEGATIVE	NO	F	21	URBAN	Owan-East	Polytechnic	Farmer	Widow(er)	Muslim	Mud	1-5	PL	Yes	No	No	No	ASB	Rain	Dr/Bu/Jc	Yes	6-12mnts	HC	DK
460	NEGATIVE	NO	M	21	RURAL	Etsako-Central	No Education	Artisan	Single	Muslim	Cement	6-10	WS	Yes	Yes	No	Yes	POP	River/Stream	Claypots	Yes	6-12mnts	HSP	DK
461	NEGATIVE	NO	M	28	RURAL	Owan-West	No Education	Artisan	Single	Christian	Cement	6-10	WS	Yes	No	No	Yes	ASB	River/Stream	Dr/Bu/Jc	Yes	6-12mnts	Trad	C/Q
462	NEGATIVE	NO	F	29	RURAL	Etsako-Central	Polytechnic	Farmer	Single	Christian	Cement	6-10	PL	No	No	No	Yes	None	River/Stream	Dr/Bu/Jc	Yes	6-12mnts	HC	AF
463	NEGATIVE	NO	M	28	RURAL	Etsako-West	Primary	Artisan	Single	Christian	Cement	1-5	WS	Yes	Yes	No	Yes	PVC	River/Stream	Dr/Bu/Jc	Yes	6-12mnts	HC	Herbs
464	NEGATIVE	NO	M	27	RURAL	Owan-East	Secondary	Pupil/Student	Single	Christian	Mud	6-10	PL	Yes	Yes	No	Yes	None	Dam/Tap	Tanks	Yes	1-5 mnts	HC	AF
465	NEGATIVE	NO	F	21	RURAL	Etsako-Central	Polytechnic	Unemployed	Single	Christian	Cement	6-10	WS	No	Yes	No	Yes	ASB	Borehole	Dr/Bu/Jc	Yes	6-12mnts	Pharm/CS	C/Q
466	NEGATIVE	NO	M	24	RURAL	Owan-West	Secondary	Farmer	Single	Muslim	Mud	6-10	WS	No	Yes	No	Yes	None	River/Stream	Dr/Bu/Jc	Yes	6-12mnts	Pharm/CS	C/Q
467	NEGATIVE	NO	M	28	RURAL	Etsako-East	Primary	Business	Single	Muslim	Cement	1-5	WS	Yes	No	No	Yes	PVC	River/Stream	Tanks	Yes	1-5 mnts	Pharm/CS	AF
468	NEGATIVE	NO	M	27	RURAL	Owan-East	Polytechnic	Pupil/Student	Single	Muslim	Cement	6-10	WS	Yes	No	No	Yes	None	River/Stream	Dr/Bu/Jc	Yes	1-5 mnts	Trad	DK
469	POSITIVE	NO	M	6	RURAL	Owan-East	Secondary	Artisan	Single	Christian	Mud	Above 10	PL	Yes	Yes	Yes	Yes	ASB	Rain	Dr/Bu/Jc	Yes	1 yr above	HSP	AF
470	NEGATIVE	NO	M	30	RURAL	Akoko-Edo	Secondary	Pupil/Student	Married	Christian	Cement	6-10	WS	Yes	Yes	No	No	Ply/Plas	Dam/Tap	Claypots	Yes	1-5 mnts	Pharm/CS	Herbs
471	NEGATIVE	NO	F	33	RURAL	Owan-West	No Education	Farmer	Married	Christian	Cement	1-5	WS	No	Yes	No	No	ASB	River/Stream	Dr/Bu/Jc	Yes	1-5 mnts	HC	AF
472	POSITIVE	NO	M	5	RURAL	Etsako-East	No Education	Farmer	Single	Christian	Cement	Above 10	BT	Yes	Yes	Yes	No	ASB	River/Stream	Claypots	Yes	1-5 mnts	Trad	AF
473	NEGATIVE	NO	M	34	RURAL	Owan-East	University	Pupil/Student	Divorced/SP	Christian	Cement	1-5	WS	Yes	Yes	No	Yes	PVC	River/Stream	Dr/Bu/Jc	Yes	1-5 mnts	Pharm/CS	AF
474	NEGATIVE	NO	M	22	RURAL	Etsako-Central	Secondary	Artisan	Single	Christian	Cement	1-5	BT	Yes	No	No	Yes	None	River/Stream	Dr/Bu/Jc	Yes	6-12mnts	Trad	DK
475	NEGATIVE	NO	M	29	RURAL	Etsako-Central	Polytechnic	Civil Servant	Married	Christian	Cement	1-5	WS	Yes	No	No	Yes	None	River/Stream	Tanks	Yes	6-12mnts	Pharm/CS	C/Q
476	NEGATIVE	NO	M	33	RURAL	Owan-East	Primary	Farmer	Divorced/SP	Muslim	Cement	6-10	WS	No	Yes	No	Yes	None	Dam/Tap	Dr/Bu/Jc	Yes	6-12mnts	Pharm/CS	AF
477	NEGATIVE	NO	M	29	RURAL	Etsako-East	Secondary	Pupil/Student	Single	Muslim	Cement	6-10	WS	Yes	No	No	Yes	PVC	River/Stream	Tanks	Yes	6-12mnts	HC	Herbs
478	NEGATIVE	NO	M	31	RURAL	Owan-West	University	Pupil/Student	Divorced/SP	Christian	Mud	1-5	WS	No	No	No	Yes	ASB	River/Stream	Tanks	Yes	6-12mnts	HC	DK
479	NEGATIVE	NO	M	35	RURAL	Etsako-Central	No Education	Farmer	Divorced/SP	Christian	Mud	1-5	PL	Yes	Yes	No	Yes	ASB	Dam/Tap	Dr/Bu/Jc	Yes	1-5 mnts	Pharm/CS	AF
480	NEGATIVE	NO	M	22	RURAL	Etsako-West	Secondary	Unemployed	Single	Christian	Cement	1-5	WS	Yes	No	No	No	Ply/Plas	River/Stream	Dr/Bu/Jc	Yes	1-5 mnts	Pharm/CS	AF
481	NEGATIVE	NO	M	28	RURAL	Owan-East	Primary	Civil Servant	Single	Christian	Mud	1-5	WS	No	No	No	Yes	None	Rain	Dr/Bu/Jc	Yes	1-5 mnts	HSP	AF
482	NEGATIVE	NO	M	26	RURAL	Akoko-Edo	Secondary	Farmer	Married	Muslim	Cement	6-10	PL	No	Yes	No	Yes	PVC	River/Stream	Dr/Bu/Jc	Yes	6-12mnts	Trad	DK
483	POSITIVE	YES	F	11	RURAL	Owan-West	Secondary	Farmer	Divorced/SP	Christian	Mud	1-5	PL	Yes	Yes	No	Yes	ASB	Dam/Tap	Tanks	Yes	6-12mnts	HC	Herbs
484	NEGATIVE	NO	F	25	URBAN	Owan-East	University	Pupil/Student	Married	Muslim	Cement	6-10	WS	Yes	Yes	No	Yes	PVC	River/Stream	Tanks	Yes	6-12mnts	HC	C/Q
485	NEGATIVE	NO	M	35	URBAN	Owan-East	No Education	Unemployed	Married	Christian	Cement	1-5	WS	Yes	Yes	No	Yes	PVC	Borehole	Tanks	Yes	1-5 mnts	HC	C/Q
486	NEGATIVE	NO	M	24	URBAN	Etsako-Central	Secondary	Artisan	Single	Christian	Cement	1-5	WS	Yes	Yes	No	Yes	ASB	Dam/Tap	Tanks	Yes	1-5 mnts	HSP	AF
487	NEGATIVE	NO	F	21	URBAN	Etsako-East	Primary	Farmer	Single	Christian	Cement	1-5	WS	No	No	No	Yes	None	River/Stream	Dr/Bu/Jc	Yes	6-12mnts	HC	DK
488	NEGATIVE	YES	F	31	URBAN	Owan-West	Polytechnic	Pupil/Student	Married	Christian	Mud	1-5	WS	No	No	No	Yes	PVC	River/Stream	Tanks	Yes	6-12mnts	HC	AF
489	NEGATIVE	NO	M	27	URBAN	Owan-East	Secondary	Pupil/Student	Single	Muslim	Cement	6-10	WS	Yes	Yes	No	Yes	None	Dam/Tap	Dr/Bu/Jc	Yes	6-12mnts	HC	DK
490	NEGATIVE	NO	F	31	URBAN	Etsako-Central	Secondary	Pupil/Student	Married	Christian	Cement	6-10	WS	Yes	No	No	Yes	Ply/Plas	River/Stream	Dr/Bu/Jc	Yes	6-12mnts	Trad	AF
491	NEGATIVE	NO	M	24	URBAN	Etsako-East	Polytechnic	Farmer	Single	Christian	Cement	1-5	WS	Yes	No	No	Yes	ASB	River/Stream	Tanks	Yes	6-12mnts	Pharm/CS	AF
492	NEGATIVE	YES	M	24	URBAN	Owan-West	Primary	Artisan	Single	Christian	Mud	6-10	WS	Yes	Yes	No	Yes	None	River/Stream	Dr/Bu/Jc	Yes	6-12mnts	Trad	Herbs
493	NEGATIVE	NO	M	32	URBAN	Akoko-Edo	Polytechnic	Civil Servant	Married	Christian	Cement	6-10	PL	No	No	No	Yes	None	Dam/Tap	Dr/Bu/Jc	Yes	1-5 mnts	Trad	AF
494	NEGATIVE	NO	F	30	URBAN	Owan-West	Secondary	Artisan	Married	Christian	Cement	6-10	WS	Yes	Yes	No	No	ASB	River/Stream	Dr/Bu/Jc	Yes	6-12mnts	Trad	DK
495	NEGATIVE	NO	F	25	URBAN	Etsako-West	Polytechnic	Farmer	Married	Christian	Cement	1-5	WS	Yes	Yes	No	Yes	ASB	River/Stream	Tanks	Yes	6-12mnts	HSP	AF
496	NEGATIVE	NO	M	33	URBAN	Owan-West	Primary	Pupil/Student	Married	Christian	Cement	6-10	PL	Yes	Yes	No	Yes	ASB	River/Stream	Dr/Bu/Jc	Yes	1-5 mnts	HSP	AF
497	NEGATIVE	NO	F	21	URBAN	Etsako-Central	Secondary	Pupil/Student	Married	Christian	Mud	Above 10	WS	Yes	Yes	No	Yes	None	Rain	Dr/Bu/Jc	Yes	1-5 mnts	Pharm/CS	AF
498	NEGATIVE	NO	F	22	URBAN	Owan-East	University	Farmer	Married	Christian	Cement	Above 10	WS	Yes	No	No	Yes	None	Dam/Tap	Dr/Bu/Jc	Yes	1-5 mnts	HSP	C/Q
499	POSITIVE	NO	F	9	RURAL	Etsako-West	Primary	Artisan	Single	Christian	Mud	Above 10	PL	No	Yes	No	Yes	ASB	Dam/Tap	Dr/Bu/Jc	Yes	1-5 mnts	HC	AF
500	NEGATIVE	NO	M	30	RURAL	Etsako-East	No Education	Artisan	Married	Christian	Cement	1-5	PL	No	No	No	Yes	ASB	Borehole	Dr/Bu/Jc	Yes	1-5 mnts	HC	DK
501	NEGATIVE	NO	M	32	RURAL	Owan-West	Secondary	Pupil/Student	Married	Christian	Mud	1-5	WS	Yes	Yes	No	Yes	PVC	River/Stream	Dr/Bu/Jc	Yes	1-5 mnts	HC	AF
502	NEGATIVE	NO	F	34	RURAL	Owan-East	University	Farmer	Married	Christian	Mud	1-5	WS	Yes	No	No	Yes	Ply/Plas	River/Stream	Tanks	Yes	1-5 mnts	HC	AF
503	NEGATIVE	NO	M	21	RURAL	Etsako-East	No Education	Unemployed	Single	Christian	Cement	1-5	WS	Yes	No	No	Yes	None	Dam/Tap	Dr/Bu/Jc	Yes	1-5 mnts	HC	AF
504	NEGATIVE	NO	F	31	RURAL	Owan-West	Secondary	Artisan	Married	Christian	Cement	6-10	PL	Yes	No	No	Yes	None	River/Stream	Dr/Bu/Jc	Yes	6-12mnts	Pharm/CS	AF
505	NEGATIVE	NO	F	33	URBAN	Etsako-Central	Polytechnic	Farmer	Married	Muslim	Cement	Above 10	PL	No	Yes	No	Yes	None	River/Stream	Dr/Bu/Jc	Yes	6-12mnts	Pharm/CS	DK
506	NEGATIVE	NO	M	26	URBAN	Owan-West	Secondary	Artisan	Married	Christian	Cement	1-5	WS	Yes	Yes	No	Yes	ASB	River/Stream	Tanks	Yes	6-12mnts	Pharm/CS	DK
507	NEGATIVE	NO	F	28	URBAN	Etsako-West	Primary	Civil Servant	Single	Muslim	Cement	Above 10	WS	Yes	Yes	No	Yes	None	Dam/Tap	Tanks	Yes	1-5 mnts	HSP	Herbs
508	NEGATIVE	NO	M	27	RURAL	Etsako-Central	Secondary	Farmer	Single	Muslim	Cement	6-10	WS	Yes	No	No	No	Ply/Plas	Dam/Tap	Tanks	Yes	6-12mnts	HSP	Herbs
509	NEGATIVE	NO	F	25	URBAN	Etsako-East	Polytechnic	Pupil/Student	Married	Muslim	Mud	6-10	WS	No	No	No	Yes	None	River/Stream	Dr/Bu/Jc	Yes	6-12mnts	HC	Herbs
510	NEGATIVE	NO	F	34	URBAN	Owan-East	No Education	Business	Married	Christian	Cement	1-5	WS	Yes	Yes	No	Yes	PVC	River/Stream	Claypots	Yes	6-12mnts	Trad	AF
511	NEGATIVE	NO	F	26	URBAN	Owan-East	Secondary	Pupil/Student	Married	Muslim	Cement	6-10	WS	Yes	No	No	Yes	PVC	River/Stream	Dr/Bu/Jc	Yes	1-5 mnts	Pharm/CS	DK
512	NEGATIVE	NO	F	31	URBAN	Akoko-Edo	University	Pupil/Student	Married	Muslim	Cement	Above 10	PL	Yes	No	No	Yes	PVC	Borehole	Tanks	Yes	1-5 mnts	HC	DK
513	NEGATIVE	NO	F	21	URBAN	Akoko-Edo	Primary	Unemployed	Married	Christian	Cement	6-10	WS	Yes	Yes	No	Yes	ASB	River/Stream	Tanks	Yes	1-5 mnts	Trad	AF
514	NEGATIVE	NO	M	28	URBAN	Owan-East	University	Farmer	Single	Christian	Cement	1-5	WS	No	No	No	Yes	None	Dam/Tap	Tanks	Yes	6-12mnts	HSP	AF
515	NEGATIVE	NO	M	20	URBAN	Owan-West	Secondary	Pupil/Student	Single	Christian	Cement	1-5	WS	Yes	No	No	Yes	None	River/Stream	Tanks	Yes	6-12mnts	Trad	C/Q
516	NEGATIVE	NO	M	30	URBAN	Akoko-Edo	No Education	Artisan	Married	Christian	Cement	1-5	BT	No	Yes	No	Yes	PVC	Rain	Tanks	Yes	6-12mnts	HC	DK
517	NEGATIVE	NO	F	25	URBAN	Etsako-East	Secondary	Civil Servant	Married	Muslim	Cement	6-10	WS	No	Yes	No	Yes	ASB	River/Stream	Dr/Bu/Jc	Yes	6-12mnts	HC	AF
518	NEGATIVE	NO	M	25	URBAN	Owan-East	Polytechnic	Farmer	Married	Christian	Cement	6-10	WS	Yes	Yes	No	Yes	ASB	Dam/Tap	Dr/Bu/Jc	Yes	6-12mnts	HC	AF
519	POSITIVE	NO	F	9	RURAL	Etsako-East	COE	Artisan	Single	Christian	Cement	Above 10	PL	No	No	No	Yes	PVC	Dam/Tap	Dr/Bu/Jc	Yes	1-5 mnts	Trad	AF
520	NEGATIVE	NO	M	33	RURAL	Etsako-Central	Primary	Artisan	Married	Christian	Mud	1-5	WS	No	Yes	No	Yes	ASB	River/Stream	Dr/Bu/Jc	Yes	1-5 mnts	Trad	AF
521	POSITIVE	NO	F	10	RURAL	Owan-East	No Education	Farmer	Divorced/SP	Christian	Cement	6-10	BT	No	No	No	No	PVC	River/Stream	Tanks	Yes	1-5 mnts	Pharm/CS	AF
522	NEGATIVE	YES	F	22	RURAL	Owan-West	Secondary	Artisan	Married	Christian	Mud	1-5	WS	No	Yes	No	Yes	Ply/Plas	River/Stream	Dr/Bu/Jc	Yes	6-12mnts	HSP	AF
523	POSITIVE	NO	M	14	RURAL	Owan-West	Secondary	Pupil/Student	Divorced/SP	Muslim	Cement	Above 10	PL	Yes	Yes	No	Yes	None	River/Stream	Dr/Bu/Jc	Yes	1-5 mnts	HSP	AF
524	POSITIVE	NO	M	13	RURAL	Etsako-West	No Education	Artisan	Widow(er)	Muslim	Mud	1-5	PL	No	No	Yes	No	ASB	River/Stream	Dr/Bu/Jc	Yes	1-5 mnts	HC	AF
525	NEGATIVE	NO	M	33	URBAN	Etsako-West	Secondary	Farmer	Married	Christian	Cement	1-5	WS	Yes	No	No	Yes	ASB	River/Stream	Tanks	Yes	6-12mnts	HSP	AF
526	NEGATIVE	NO	F	34	URBAN	Akoko-Edo	University	Pupil/Student	Married	Muslim	Cement	1-5	WS	No	No	No	Yes	Ply/Plas	Dam/Tap	Dr/Bu/Jc	Yes	6-12mnts	Pharm/CS	Herbs
527	NEGATIVE	NO	M	34	URBAN	Owan-West	No Education	Unemployed	Married	Muslim	Cement	6-10	WS	Yes	No	No	No	None	Borehole	Dr/Bu/Jc	Yes	1-5 mnts	HC	Herbs
528	NEGATIVE	NO	M	32	URBAN	Etsako-Central	Secondary	Pupil/Student	Married	Christian	Mud	Above 10	WS	No	Yes	No	Yes	ASB	Borehole	Dr/Bu/Jc	Yes	1-5 mnts	Pharm/CS	Herbs
529	NEGATIVE	NO	M	26	URBAN	Etsako-East	University	Pupil/Student	Married	Christian	Mud	1-5	WS	No	No	No	Yes	None	River/Stream	Tanks	Yes	1-5 mnts	HC	AF
530	NEGATIVE	NO	F	33	URBAN	Owan-East	No Education	Farmer	Married	Christian	Cement	1-5	WS	Yes	No	No	Yes	PVC	Dam/Tap	Dr/Bu/Jc	Yes	6-12mnts	HC	DK
531	NEGATIVE	NO	F	29	URBAN	Etsako-Central	Secondary	Pupil/Student	Single	Christian	Cement	1-5	WS	Yes	Yes	No	Yes	None	River/Stream	Dr/Bu/Jc	Yes	6-12mnts	HC	C/Q
532	POSITIVE	NO	M	14	RURAL	Owan-West	Primary	Farmer	Widow(er)	Christian	Cement	Above 10	PL	Yes	No	No	No	PVC	Dam/Tap	Claypots	Yes	6-12mnts	Pharm/CS	Herbs
533	POSITIVE	NO	M	28	RURAL	Akoko-Edo	Primary	Unemployed	Married	Christian	Mud	6-10	BT	Yes	Yes	No	Yes	ASB	Dam/Tap	Tanks	No	NA	Pharm/CS	DK
534	NEGATIVE	NO	M	34	RURAL	Owan-East	Secondary	Civil Servant	Married	Christian	Cement	1-5	PL	Yes	Yes	No	Yes	Ply/Plas	Borehole	Dr/Bu/Jc	Yes	6-12mnts	HSP	AF
535	NEGATIVE	NO	M	32	RURAL	Etsako-East	Secondary	Farmer	Married	Christian	Mud	6-10	WS	No	Yes	No	Yes	ASB	Borehole	Dr/Bu/Jc	Yes	6-12mnts	Pharm/CS	Herbs
536	POSITIVE	NO	F	21	RURAL	Etsako-West	Secondary	Business	Married	Christian	Mud	Above 10	PL	Yes	Yes	No	No	ASB	River/Stream	Dr/Bu/Jc	Yes	1-5 mnts	HSP	Herbs
537	NEGATIVE	NO	F	29	URBAN	Owan-East	Primary	Artisan	Single	Christian	Cement	6-10	WS	No	Yes	No	Yes	None	River/Stream	Tanks	Yes	6-12mnts	Trad	Herbs
538	NEGATIVE	NO	M	23	URBAN	Etsako-West	University	Artisan	Single	Muslim	Mud	6-10	WS	Yes	Yes	No	Yes	None	River/Stream	Dr/Bu/Jc	Yes	1-5 mnts	HSP	DK
539	NEGATIVE	NO	F	27	URBAN	Etsako-Central	Secondary	Artisan	Single	Christian	Cement	1-5	WS	Yes	Yes	No	Yes	ASB	River/Stream	Dr/Bu/Jc	Yes	6-12mnts	HSP	DK
540	NEGATIVE	NO	F	34	URBAN	Owan-East	Secondary	Farmer	Married	Muslim	Cement	1-5	WS	Yes	No	No	Yes	None	Dam/Tap	Dr/Bu/Jc	Yes	6-12mnts	Trad	Herbs
541	POSITIVE	NO	M	7	RURAL	Owan-East	No Education	Farmer	Single	Muslim	Mud	6-10	BT	Yes	Yes	No	No	ASB	Dam/Tap	Claypots	Yes	1-5 mnts	Trad	AF
542	NEGATIVE	NO	F	24	RURAL	Etsako-East	Primary	Pupil/Student	Married	Christian	Cement	1-5	PL	No	No	No	Yes	PVC	Borehole	Dr/Bu/Jc	Yes	6-12mnts	HC	AF
543	NEGATIVE	NO	F	29	RURAL	Owan-East	Secondary	Business	Married	Muslim	Cement	Above 10	WS	No	Yes	No	Yes	PVC	Borehole	Tanks	Yes	6-12mnts	Trad	AF
544	NEGATIVE	NO	F	33	RURAL	Akoko-Edo	No Education	Farmer	Married	Muslim	Cement	6-10	WS	Yes	No	No	No	PVC	River/Stream	Dr/Bu/Jc	Yes	1-5 mnts	Pharm/CS	DK
545	NEGATIVE	NO	M	30	RURAL	Akoko-Edo	Secondary	Farmer	Married	Christian	Cement	6-10	WS	Yes	No	No	Yes	Ply/Plas	River/Stream	Dr/Bu/Jc	Yes	1-5 mnts	HC	DK
546	NEGATIVE	NO	F	29	RURAL	Akoko-Edo	Primary	Pupil/Student	Married	Christian	Mud	Above 10	WS	Yes	Yes	No	Yes	ASB	River/Stream	Tanks	Yes	1-5 mnts	HC	DK
547	NEGATIVE	NO	F	33	RURAL	Owan-East	University	Civil Servant	Married	Christian	Mud	1-5	WS	No	No	No	Yes	ASB	Rain	Tanks	Yes	1-5 mnts	HC	Herbs
548	POSITIVE	NO	F	21	RURAL	Etsako-East	COE	Artisan	Married	Christian	Cement	Above 10	PL	Yes	Yes	No	Yes	ASB	River/Stream	Dr/Bu/Jc	No	NA	HC	DK
549	NEGATIVE	NO	M	26	RURAL	Owan-East	No Education	Unemployed	Married	Christian	Cement	1-5	BT	No	No	No	Yes	PVC	Dam/Tap	Dr/Bu/Jc	Yes	1-5 mnts	HSP	Herbs
550	NEGATIVE	NO	M	31	RURAL	Etsako-Central	Secondary	Artisan	Married	Muslim	Cement	1-5	PL	Yes	Yes	No	Yes	ASB	River/Stream	Dr/Bu/Jc	Yes	6-12mnts	HSP	AF
551	NEGATIVE	NO	F	30	RURAL	Etsako-East	Secondary	Artisan	Married	Muslim	Cement	1-5	WS	Yes	No	No	Yes	ASB	River/Stream	Claypots	Yes	6-12mnts	HSP	DK
552	NEGATIVE	NO	F	28	RURAL	Owan-West	No Education	Unemployed	Single	Christian	Cement	6-10	WS	Yes	No	No	Yes	Ply/Plas	River/Stream	Dr/Bu/Jc	Yes	6-12mnts	HSP	AF
553	NEGATIVE	NO	M	31	RURAL	Etsako-Central	Secondary	Farmer	Married	Muslim	Cement	6-10	PL	Yes	Yes	No	Yes	Ply/Plas	Dam/Tap	Tanks	Yes	1-5 mnts	Pharm/CS	Herbs
554	NEGATIVE	NO	F	24	RURAL	Owan-East	Secondary	Farmer	Married	Muslim	Cement	6-10	WS	No	No	No	Yes	PVC	Dam/Tap	Tanks	Yes	6-12mnts	Trad	Herbs
555	POSITIVE	NO	M	9	RURAL	Owan-West	Primary	Farmer	Single	Christian	Mud	1-5	PL	Yes	Yes	Yes	Yes	ASB	Dam/Tap	Tanks	Yes	1-5 mnts	HC	AF
556	NEGATIVE	NO	M	25	URBAN	Etsako-East	Polytechnic	Pupil/Student	Married	Christian	Cement	1-5	BT	No	No	No	Yes	ASB	River/Stream	Dr/Bu/Jc	Yes	6-12mnts	Trad	AF
557	NEGATIVE	NO	F	25	URBAN	Owan-West	Polytechnic	Unemployed	Married	Christian	Mud	6-10	WS	Yes	Yes	No	Yes	ASB	River/Stream	Dr/Bu/Jc	Yes	6-12mnts	HC	AF
558	NEGATIVE	NO	F	34	URBAN	Etsako-Central	Primary	Farmer	Married	Christian	Mud	6-10	WS	No	Yes	No	Yes	None	River/Stream	Dr/Bu/Jc	Yes	6-12mnts	Pharm/CS	DK
559	NEGATIVE	NO	F	25	URBAN	Owan-East	Secondary	Farmer	Married	Christian	Cement	6-10	WS	No	Yes	No	No	None	Dam/Tap	Dr/Bu/Jc	Yes	1-5 mnts	HC	DK
560	NEGATIVE	NO	F	22	URBAN	Akoko-Edo	No Education	Farmer	Married	Muslim	Cement	1-5	WS	Yes	Yes	No	Yes	PVC	River/Stream	Dr/Bu/Jc	Yes	1-5 mnts	HC	DK
561	NEGATIVE	NO	F	33	URBAN	Etsako-East	Secondary	Artisan	Married	Muslim	Cement	6-10	PL	Yes	Yes	No	Yes	ASB	Rain	Dr/Bu/Jc	Yes	1-5 mnts	HC	DK
562	NEGATIVE	NO	F	30	URBAN	Etsako-Central	Secondary	Artisan	Single	Christian	Mud	6-10	BT	Yes	No	No	Yes	ASB	River/Stream	Dr/Bu/Jc	Yes	6-12mnts	Pharm/CS	AF
563	NEGATIVE	NO	F	21	URBAN	Etsako-East	Primary	Pupil/Student	Married	Christian	Mud	6-10	WS	No	No	No	Yes	None	River/Stream	Tanks	Yes	6-12mnts	HSP	AF
564	NEGATIVE	NO	M	33	RURAL	Etsako-Central	University	Pupil/Student	Married	Christian	Cement	6-10	WS	No	Yes	No	Yes	Ply/Plas	River/Stream	Tanks	Yes	6-12mnts	Pharm/CS	Herbs
565	NEGATIVE	NO	M	26	RURAL	Owan-West	Secondary	Pupil/Student	Married	Christian	Cement	1-5	WS	Yes	No	No	Yes	PVC	Dam/Tap	Dr/Bu/Jc	Yes	1-5 mnts	Pharm/CS	AF
566	POSITIVE	NO	M	11	RURAL	Akoko-Edo	No Education	Civil Servant	Widow(er)	Muslim	Cement	Above 10	PL	Yes	No	No	Yes	ASB	Dam/Tap	Dr/Bu/Jc	Yes	1-5 mnts	HC	Herbs
567	POSITIVE	YES	M	6	RURAL	Etsako-Central	Primary	Pupil/Student	Single	Christian	Cement	Above 10	BT	Yes	No	No	Yes	PVC	Dam/Tap	Dr/Bu/Jc	Yes	1-5 mnts	HSP	AF
568	NEGATIVE	YES	M	21	RURAL	Akoko-Edo	No Education	Unemployed	Single	Muslim	Cement	6-10	WS	Yes	No	No	Yes	None	Dam/Tap	Tanks	Yes	6-12mnts	HSP	AF
569	NEGATIVE	NO	F	23	URBAN	Etsako-East	Secondary	Pupil/Student	Married	Muslim	Cement	6-10	WS	Yes	Yes	No	Yes	None	River/Stream	Dr/Bu/Jc	Yes	1-5 mnts	HSP	DK
570	NEGATIVE	YES	F	21	URBAN	Etsako-Central	Secondary	Farmer	Married	Muslim	Cement	6-10	WS	No	No	No	Yes	None	Dam/Tap	Dr/Bu/Jc	Yes	1-5 mnts	HSP	AF
571	NEGATIVE	NO	M	24	URBAN	Owan-West	Primary	Pupil/Student	Married	Christian	Cement	1-5	WS	No	No	No	Yes	Ply/Plas	River/Stream	Dr/Bu/Jc	Yes	1-5 mnts	Pharm/CS	AF
572	NEGATIVE	NO	M	22	URBAN	Etsako-East	Polytechnic	Pupil/Student	Single	Muslim	Cement	6-10	WS	Yes	Yes	No	Yes	None	River/Stream	Tanks	Yes	6-12mnts	HC	AF
573	NEGATIVE	NO	M	24	URBAN	Akoko-Edo	No Education	Unemployed	Married	None	Mud	6-10	PL	No	No	No	Yes	PVC	River/Stream	Dr/Bu/Jc	Yes	6-12mnts	Trad	AF
574	NEGATIVE	NO	F	21	URBAN	Akoko-Edo	Secondary	Artisan	Married	Muslim	Mud	6-10	WS	No	No	No	Yes	None	Dam/Tap	Dr/Bu/Jc	Yes	6-12mnts	Pharm/CS	Herbs
575	NEGATIVE	NO	F	27	URBAN	Akoko-Edo	Secondary	Artisan	Single	Christian	Cement	6-10	WS	Yes	Yes	No	Yes	ASB	River/Stream	Dr/Bu/Jc	Yes	6-12mnts	Pharm/CS	AF
576	NEGATIVE	NO	M	34	RURAL	Akoko-Edo	University	Artisan	Married	Muslim	Cement	6-10	WS	Yes	No	No	No	None	Rain	Tanks	Yes	6-12mnts	HC	AF
577	POSITIVE	YES	F	26	RURAL	Owan-East	Primary	Farmer	Widow(er)	Muslim	Mud	6-10	PL	No	Yes	No	No	ASB	River/Stream	Tanks	Yes	1-5 mnts	Trad	AF
578	NEGATIVE	NO	F	24	RURAL	Owan-East	No Education	Farmer	Married	Christian	Cement	1-5	WS	Yes	Yes	No	Yes	Ply/Plas	River/Stream	Dr/Bu/Jc	Yes	1-5 mnts	HSP	DK
579	POSITIVE	NO	M	22	RURAL	Etsako-West	No Education	Pupil/Student	Widow(er)	Christian	Cement	Above 10	PL	No	Yes	No	No	ASB	Dam/Tap	Dr/Bu/Jc	No	NA	HC	AF
580	POSITIVE	YES	F	23	RURAL	Etsako-East	Secondary	Farmer	Widow(er)	Christian	Cement	1-5	BT	Yes	Yes	No	Yes	ASB	River/Stream	Dr/Bu/Jc	Yes	1 yr above	HC	Herbs
581	NEGATIVE	NO	M	28	RURAL	Etsako-East	Polytechnic	Farmer	Married	Christian	Mud	1-5	WS	No	Yes	No	Yes	Ply/Plas	River/Stream	Claypots	Yes	6-12mnts	HC	AF
582	NEGATIVE	NO	F	28	RURAL	Etsako-Central	Secondary	Pupil/Student	Married	Muslim	Cement	1-5	PL	Yes	Yes	No	Yes	None	River/Stream	Dr/Bu/Jc	Yes	6-12mnts	Pharm/CS	AF
583	POSITIVE	YES	F	22	RURAL	Owan-West	Primary	Pupil/Student	Widow(er)	None	Cement	Above 10	PL	No	No	No	Yes	ASB	Dam/Tap	Tanks	Yes	1-5 mnts	Pharm/CS	AF
584	POSITIVE	NO	F	29	RURAL	Owan-West	No Education	Business	Widow(er)	Christian	Mud	Above 10	BT	Yes	Yes	No	Yes	PVC	Dam/Tap	Tanks	Yes	1-5 mnts	HSP	DK
585	NEGATIVE	YES	M	26	RURAL	Etsako-East	No Education	Business	Married	Christian	Cement	1-5	PL	Yes	Yes	No	Yes	PVC	Dam/Tap	Tanks	Yes	6-12mnts	HSP	DK
586	POSITIVE	NO	F	31	RURAL	Akoko-Edo	COE	Unemployed	Widow(er)	Christian	Mud	6-10	PL	Yes	Yes	No	Yes	Ply/Plas	River/Stream	Dr/Bu/Jc	Yes	1-5 mnts	Trad	Herbs
587	NEGATIVE	NO	M	25	RURAL	Owan-East	Secondary	Pupil/Student	Married	Christian	Cement	6-10	WS	Yes	No	No	Yes	ASB	Dam/Tap	Dr/Bu/Jc	Yes	6-12mnts	HSP	DK
588	NEGATIVE	NO	F	32	RURAL	Etsako-Central	Secondary	Pupil/Student	Married	Muslim	Cement	6-10	WS	No	Yes	No	Yes	None	Dam/Tap	Tanks	Yes	6-12mnts	HSP	AF
589	NEGATIVE	NO	F	23	RURAL	Owan-West	Primary	Pupil/Student	Married	Muslim	Cement	1-5	WS	Yes	Yes	No	Yes	None	River/Stream	Dr/Bu/Jc	Yes	1-5 mnts	Trad	Herbs
590	POSITIVE	NO	F	25	RURAL	Owan-East	Primary	Farmer	Widow(er)	Christian	Cement	Above 10	PL	Yes	No	No	Yes	ASB	River/Stream	Dr/Bu/Jc	Yes	1-5 mnts	Trad	DK
591	NEGATIVE	NO	F	28	RURAL	Owan-East	University	Pupil/Student	Married	Muslim	Cement	1-5	WS	Yes	No	No	Yes	Ply/Plas	River/Stream	Dr/Bu/Jc	Yes	1-5 mnts	HC	AF
592	POSITIVE	NO	M	21	RURAL	Etsako-West	Secondary	Artisan	Widow(er)	Muslim	Mud	1-5	PL	No	No	No	No	ASB	Dam/Tap	Tanks	No	NA	Trad	AF
593	NEGATIVE	NO	M	28	RURAL	Etsako-East	No Education	Unemployed	Single	Muslim	Cement	1-5	PL	Yes	Yes	No	Yes	None	River/Stream	Dr/Bu/Jc	Yes	1-5 mnts	Trad	AF
594	POSITIVE	YES	M	33	RURAL	Etsako-East	No Education	Farmer	Widow(er)	Christian	Mud	Above 10	BT	Yes	Yes	Yes	Yes	ASB	Dam/Tap	Dr/Bu/Jc	Yes	1-5 mnts	HC	DK
595	POSITIVE	NO	F	22	RURAL	Owan-East	Primary	Civil Servant	Widow(er)	Muslim	Cement	Above 10	PL	No	Yes	No	Yes	None	River/Stream	Dr/Bu/Jc	Yes	1-5 mnts	Pharm/CS	Herbs
596	NEGATIVE	NO	F	32	URBAN	Etsako-Central	Secondary	Farmer	Married	Muslim	Cement	6-10	WS	No	Yes	No	Yes	PVC	Dam/Tap	Tanks	Yes	6-12mnts	Pharm/CS	DK
597	NEGATIVE	NO	M	28	URBAN	Owan-East	Secondary	Artisan	Single	Muslim	Mud	6-10	WS	Yes	Yes	No	Yes	ASB	River/Stream	Dr/Bu/Jc	Yes	6-12mnts	Pharm/CS	AF
598	NEGATIVE	NO	M	27	URBAN	Etsako-East	No Education	Unemployed	Single	Christian	Cement	1-5	WS	Yes	Yes	No	Yes	None	River/Stream	Claypots	Yes	6-12mnts	HSP	AF
599	NEGATIVE	NO	F	31	URBAN	Etsako-Central	Secondary	Pupil/Student	Married	Christian	Mud	Above 10	WS	Yes	No	No	Yes	None	River/Stream	Dr/Bu/Jc	Yes	6-12mnts	Trad	AF
600	NEGATIVE	YES	M	27	URBAN	Etsako-West	Polytechnic	Farmer	Single	Christian	Cement	Above 10	WS	No	Yes	No	Yes	Ply/Plas	River/Stream	Tanks	Yes	1-5 mnts	HC	AF
601	NEGATIVE	NO	F	29	URBAN	Etsako-East	Secondary	Pupil/Student	Single	Christian	Cement	6-10	PL	No	Yes	No	No	PVC	Dam/Tap	Tanks	Yes	6-12mnts	HC	DK
602	NEGATIVE	NO	F	24	URBAN	Akoko-Edo	No Education	Unemployed	Married	Muslim	Mud	1-5	PL	Yes	Yes	No	Yes	ASB	Dam/Tap	Tanks	Yes	6-12mnts	HC	DK
603	NEGATIVE	NO	M	28	URBAN	Akoko-Edo	Secondary	Artisan	Single	Christian	Cement	6-10	WS	Yes	No	No	Yes	Ply/Plas	River/Stream	Dr/Bu/Jc	Yes	6-12mnts	HSP	Herbs
604	NEGATIVE	NO	M	25	RURAL	Akoko-Edo	No Education	Farmer	Married	Muslim	Cement	6-10	PL	Yes	No	No	Yes	PVC	River/Stream	Tanks	Yes	6-12mnts	HSP	AF
605	POSITIVE	YES	M	28	RURAL	Akoko-Edo	No Education	Business	Widow(er)	Christian	Cement	1-5	PL	No	Yes	No	Yes	PVC	Dam/Tap	Tanks	Yes	1-5 mnts	HSP	AF

## Sheet: Sheet2
ABBREVIATIONS AND MEANING
WS	Water System
BT	Bush Toilet
PL	Pit Laterine
NA	Not Applicable
HC	Health Center
HSP	Hospital
Pharm/CS	Pharmacy/Chemist Shop
Dr/Bu/Jc	Drums/Buckets/Jerrycans
Trad	Tradomedical Home
AF	Arthemeter Family
C/Q	Chloroquine/Quinine
DK	Don't Know
ASB	Asbestos
